1 **Differential thermotolerance adaptation between species of *Coccidioides***

2

3 **Authors**

4 Heather L. Mead<sup>1</sup>, Paris S. Hamm<sup>2</sup>, Isaac N. Shaffer<sup>3</sup>, Marcus de Melo Teixeira<sup>4</sup>, Christopher  
5 Wendel<sup>5</sup>, Nathan P. Wiederhold<sup>6</sup>, George R. Thompson III<sup>7</sup>, Raquel Muñoz-Salazar<sup>8</sup>, Laura  
6 Rosio Castañón-Olivares<sup>9</sup>, Paul Keim<sup>1</sup>, Carmel Plude<sup>10</sup>, Joel Terriquez<sup>10</sup> John N. Galgiani<sup>11</sup>,  
7 Marc J. Orbach<sup>11,12</sup>, Bridget M. Barker<sup>11,12</sup>

8

9 **Affiliations**

10 <sup>1</sup>Pathogen and Microbiome Institute, Northern Arizona University, Flagstaff, AZ. U.S.A

11 <sup>2</sup>Department of Biology, University of New Mexico, Albuquerque, NM. U.S.A

12 <sup>3</sup>School of Informatics, Computers, and Cyber Systems, Northern Arizona University,  
13 Flagstaff, AZ. U.S.A

14 <sup>4</sup>Faculty of Medicine, University of Brasilia, Brasilia. Brazil

15 <sup>5</sup>Department of Medicine, University of Arizona, Tucson, AZ. U.S.A

16 <sup>6</sup>Department of Pathology and Laboratory Medicine, University of Texas Health Science  
17 Center at San Antonio, San Antonio, TX. U.S.A.

18 <sup>7</sup>Departments of Internal Medicine Division of Infectious Diseases, and Medical  
19 Microbiology and Immunology, University of California-Davis, Sacramento, CA. U.S.A

20 <sup>8</sup>Laboratorio de Epidemiología y Ecología Molecular, Escuela Ciencias de la Salud,  
21 Universidad Autónoma de Baja California, Unidad Valle Dorado, Ensenada, B. C., Mexico

22 <sup>9</sup>Department of Microbiology and Parasitology, Universidad Nacional Autónoma de México,  
23 Ciudad de México, México

24 <sup>10</sup>Northern Arizona Healthcare, Flagstaff, AZ. U.S.A.

25 <sup>11</sup>Valley Fever Center for Excellence, University of Arizona, Tucson, AZ. U.S.A

26 <sup>12</sup>School of Plant Sciences, University of Arizona, Tucson, AZ. U.S.A

27 \*Corresponding author

28 Email: [bridget.barker@nau.edu](mailto:bridget.barker@nau.edu) (BMB)

29 ¶ These authors contributed equally to the work

30

31 **Key words:** coccidioidomycosis, fungal pathogen, phenotypic variation, growth rate, Valley

32 fever

## 34 **Abstract**

35 Coccidioidomycosis, or Valley fever, is caused by two species of dimorphic fungi. Based on  
36 molecular phylogenetic evidence, the genus *Coccidioides* contains two reciprocally  
37 monophyletic species: *C. immitis* and *C. posadasii*. However, phenotypic variation between  
38 species has not been deeply investigated. We therefore explored differences in growth rate  
39 under various conditions. A collection of 39 *C. posadasii* and 46 *C. immitis* isolates,  
40 representing the full geographical range of the two species, were screened for mycelial growth  
41 rate at 37°C and 28°C on solid media. The radial growth rate was measured over 16 days on  
42 yeast extract agar. A linear mixed effect model was used to compare the growth rate of *C.*  
43 *posadasii* and *C. immitis* at 37°C and 28°C respectively. *C. posadasii* grew significantly faster  
44 at 37°C, when compared to *C. immitis*; whereas both species had similar growth rates at 28°C.  
45 These results indicate thermotolerance differs between these two species. As the ecological  
46 niche has not been well-described for *Coccidioides* spp., and disease variability between  
47 species has not been shown, the evolutionary pressure underlying the adaptation is unclear.  
48 However, this research reveals the first significant phenotypic difference between the two  
49 species that directly applies to ecological and clinical research.

## 50 **Author Summary**

51 The two species of *Coccidioides* are genetically distinct. However, phenotypic variation has  
52 not been well-characterized. In this study we identify a significant and reproducible  
53 phenotypic difference between the two species, namely that *C. posadasii* grows faster at 37°C  
54 than *C. immitis* on yeast extract agar. This is the first significant phenotypic difference

55 documented for multiple strains across the geographic range of *Coccidioides*. The clinical or  
56 ecological relevance of this observation remains to be elucidated.

## 57 **Introduction**

58 Coccidioidomycosis, or Valley fever, is an environmentally acquired disease caused  
59 by inhalation of arthroconidia of dimorphic fungi belonging to the genus *Coccidioides*. In the  
60 environment, the fungi grow as filamentous mycelia, alternate cells of which autolyze and  
61 become fragile, leaving intact asexual arthroconidia that may disperse via wind or soil  
62 disruption. If inhaled by a susceptible host, an arthroconidium switches to a host-associated  
63 lifecycle and develops into a specialized infectious structure called a spherule. Subsequently,  
64 the host's immune system either represses spherule replication or the host succumbs to the  
65 illness [1, 2]. It is thought that symptomatic infection occurs in approximately 40% of human  
66 patients, who exhibit a broad spectrum of clinical symptoms, ranging from acute self-limited  
67 pneumonia, fibrocavitary chronic pulmonary infection, or hematogenous spread to  
68 extrapulmonary locations (disseminated infection) [3]. By one estimate, there are 146,000 new  
69 symptomatic U.S. coccidioidal infections each year [4].

70 Coccidioidomycosis is caused by two species, *C. immitis* and *C. posadasii*. Genetic  
71 analysis of multiple molecular markers has defined two monophyletic clades [5]. Subsequent  
72 population genetic/genomic studies revealed that *C. immitis* is composed of at least two  
73 populations in the western U.S., and *C. posadasii* is composed of three populations widely  
74 dispersed across the American continents [6-9]. Given the high number of autapomorphic  
75 mutations between *Coccidioides* species and among isolates within species, variation in  
76 phenotypes is predicted [10]. However, minimal work characterizing phenotypic differences

77 has been undertaken. A previous study demonstrated that *C. immitis in vitro* spherules grew  
78 in a synchronous pattern where *C. posadasii* isolates did not [11]. Differences in pathogenesis  
79 and other disease-associated phenotypic characteristics among strains have been reported,  
80 although only one study had species information [12-17]. The publication that defined the  
81 novel species *C. posadasii* also found species-specific variance in growth rate on media  
82 containing 0.136M NaCl, suggesting that *C. immitis* is more salt tolerant than *C. posadasii*,  
83 but due to overlap in the phenotype, and evaluation of only 10 isolates of each species, it was  
84 not statistically meaningful [5]. These data supported observations published in the 1950s -  
85 60s, which proposed that salinity of the soil may be a factor in determining the distribution of  
86 *C. immitis* in Californian soil [18-20]. In contrast, a correlation of *C. posadasii* with saline  
87 soils was not observed in Arizona, where other associations were observed [21-25].  
88 Importantly, recent modeling analysis predicts the future expansion of *Coccidioides* species  
89 in response to climate dynamics [26]. Therefore, a robust investigation of abiotic tolerances  
90 that may either limit or enhance distribution of *Coccidioides* is needed [1, 27, 28]. Such vital  
91 information could provide clues regarding the ecological niche, geographical range limits, or  
92 host-specific adaptations of the two species of *Coccidioides*.

93 The division of *Coccidioides* into two species has been challenged by clinicians  
94 because of the lack of apparent difference in disease manifestation caused by the two  
95 pathogens, but recent work suggests that there might be differences in dissemination patterns  
96 between the species [1, 2, 29]. Unfortunately, diagnosis and treatment of coccidioidomycosis  
97 does not require clinicians to identify to species. The current diagnostic methods; AccuProbe®  
98 [30], CocciDx [31], and CocciENV [32], do not distinguish between the two species.  
99 Molecular-based technologies exist to differentiate the two species, but these have not been

100 adapted to clinical use [33, 34]. However, genotyping the causative agent would allow  
101 correlation of clinical presentations and outcomes associated with species. Severe disease and  
102 death typically occurs in high risk group patients; however, seemingly healthy individuals can  
103 succumb as well, without a known host immunologic or pathogen genotypic explanation [35].  
104 Currently, the range of disease manifestations is suggested to be primarily due to host factors  
105 [36, 37]. There are data supporting variation of virulence among individual isolates, but there  
106 is limited research on the subject [1, 12, 15, 16, 38]. A reasonable hypothesis would  
107 acknowledge that both host and pathogen genetics play a role in disease outcome [39-42].

108         Thermotolerance is an intrinsic characteristic of an organism that allows for tolerance  
109 of excessively high temperatures. Heat acclimation can shape natural populations for a wide  
110 range of microorganisms, and is a physiological adaptation to heat stress imposed by the  
111 colonization of new habitats, global climate change and encountering new hosts [43-51]. This  
112 “preadaptation” is particularly important to pathogenic fungi that tolerate growth in high  
113 temperatures, which allows colonization of mammalian tissues [52, 53]. For example,  
114 *Coccidioides* is adapted to grow at high temperatures in the environment (i.e. North and South  
115 American deserts), and is able to colonize a wide range of endothermic hosts throughout the  
116 Americas [54-58]. *C. immitis* is endemic to the California Central Valley, whereas *C.*  
117 *posadasii* is widely distributed, but has highest prevalence in the Sonoran Desert. The annual  
118 mean temperature varies between the hotspot areas, with the California Central Valley having  
119 more mild temperatures compared to the Sonoran Desert, which led us to hypothesize that *C.*  
120 *posadasii* is more thermotolerant than *C. immitis*. Therefore, we investigated the growth rate  
121 of both species at 37°C and 28°C, so that we might elucidate species-specific phenotypic

122 variation. Here we demonstrate thermotolerance dissimilarity of the two species by analyzing  
123 growth rates of 85 isolates at these two temperatures.

## 124 **Results**

125 To define variability of one phenotypic trait between two *Coccidioides* species, we examined  
126 the ability of *Coccidioides* spp. to grow in filamentous form at 37°C and 28°C on yeast extract  
127 (YE) agar. Growth rate differences were observed between *C. immitis* and *C. posadasii*, with  
128 the growth of *C. immitis* significantly reduced ( $p < 0.001$ ) at 37°C compared to *C. posadasii*  
129 (Fig 1). In contrast, both strains grew equally well at 28°C ( $p$ -value = 0.072).

130 **Fig 1. Temperature impacts growth ability of *C. immitis* isolates compared to *C. posadasii***  
131 **on YE media.** Seven mm diameter plugs were sub-cultured onto yeast extract plates and radial  
132 growth was documented over 16 days. (A) Radial growth measurements at 37°C for 46 *C.*  
133 *posadasii* and 39 *C. immitis* isolates in triplicate. (B) Radial growth measurements at 28°C for  
134 46 *C. posadasii* and 39 *C. immitis* isolates in triplicate. (C) Representative samples of  
135 phenotypic variation observed between species on day 16.

136 Based on these initial observations, we surveyed 85 strains of *Coccidioides*, representing  
137 isolates from the entire geographical range of *Coccidioides*, for growth rate differences  
138 between species at 37°C and 28°C. Initial investigations occurred at the University of Arizona,  
139 and subsequent studies occurred at Northern Arizona University (Table 1).

140 **Table 1. Strain information**

| <b>ID</b>   | <b>Species</b>    | <b>Geographical Origin<sup>a</sup></b> | <b>Source</b>                                     | <b>Testing Institution</b> |
|-------------|-------------------|----------------------------------------|---------------------------------------------------|----------------------------|
| <b>CA22</b> | <i>C. immitis</i> | California                             | University of Texas Health Science Center (UTHSC) | NAU                        |

|                    |                     |                     |                                      |                |
|--------------------|---------------------|---------------------|--------------------------------------|----------------|
| <b>500</b>         | <i>C. posadasii</i> | Soil, Tucson, AZ    | University of Arizona (UA)           | UA             |
| <b>IL1</b>         | <i>C. posadasii</i> | Illinois            | UTHSC                                | NAU            |
| <b>CA23</b>        | <i>C. immitis</i>   | California          | UTHSC                                | NAU            |
| <b>HS-I-000718</b> | <i>C. posadasii</i> | Arizona             | Flagstaff Medical Center (FMC)       | NAU            |
| <b>GT164</b>       | <i>C. posadasii</i> | Texas               | University of California Davis (UCD) | NAU            |
| <b>GT163</b>       | <i>C. immitis</i>   | California          | UCD                                  | NAU            |
| <b>HS-I-000588</b> | <i>C. posadasii</i> | Arizona             | FMC                                  | NAU            |
| <b>CA28</b>        | <i>C. immitis</i>   | California          | UTHSC                                | NAU            |
| <b>TX4</b>         | <i>C. posadasii</i> | Texas               | UTHSC                                | NAU            |
| <b>HS-I-000235</b> | <i>C. posadasii</i> | Arizona             | FMC                                  | NAU            |
| <b>TX1</b>         | <i>C. posadasii</i> | Texas               | UTHSC                                | NAU            |
| <b>HS-I-000778</b> | <i>C. posadasii</i> | Arizona             | FMC                                  | NAU            |
| <b>GT147</b>       | <i>C. immitis</i>   | California          | UCD                                  | NAU            |
| <b>HS-I-000234</b> | <i>C. posadasii</i> | Texas               | FMC                                  | NAU            |
| <b>CA30</b>        | <i>C. immitis</i>   | California          | UTHSC                                | NAU            |
| <b>HS-I-000547</b> | <i>C. posadasii</i> | Arizona             | FMC                                  | NAU            |
| <b>HS-I-000233</b> | <i>C. posadasii</i> | Arizona             | FMC                                  | NAU            |
| <b>GT166</b>       | <i>C. posadasii</i> | Texas               | UCD                                  | NAU            |
| <b>CA24</b>        | <i>C. immitis</i>   | California          | UTHSC                                | NAU            |
| <b>CA29</b>        | <i>C. immitis</i>   | California          | UTHSC                                | NAU            |
| <b>M211</b>        | <i>C. posadasii</i> | Central Mexico      | Unidad de Micología, UNAM            | NAU            |
| <b>GT158</b>       | <i>C. posadasii</i> | Arizona             | UCD                                  | NAU            |
| <b>CA15</b>        | <i>C. immitis</i>   | California          | UTHSC                                | NAU            |
| <b>CA27</b>        | <i>C. immitis</i>   | California          | UTHSC                                | NAU            |
| <b>TX3</b>         | <i>C. posadasii</i> | Texas               | UTHSC                                | NAU            |
| <b>CA20</b>        | <i>C. immitis</i>   | California          | UTHSC                                | NAU            |
| <b>RS</b>          | <i>C. immitis</i>   | California          | Common Strain                        | Laboratory NAU |
| <b>Silveira</b>    | <i>C. posadasii</i> | California          | Common Strain                        | Laboratory NAU |
| <b>RMSCC2378</b>   | <i>C. posadasii</i> | Argentina           | R. Negroni                           | UA             |
| <b>RMSCC2377</b>   | <i>C. posadasii</i> | Argentina           | R. Negroni                           | UA             |
| <b>RMSCC2379</b>   | <i>C. posadasii</i> | Argentina           | R. Negroni                           | UA             |
| <b>RMSCC3698</b>   | <i>C. immitis</i>   | Barstow, California | Naval Hospital                       | UA             |
| <b>RMSCC3490</b>   | <i>C. posadasii</i> | Coahuila, Mexico    | I. Gutierrez                         | UA             |
| <b>RMSCC3505</b>   | <i>C. immitis</i>   | Coahuila, Mexico    | I. Gutierrez                         | UA             |
| <b>RMSCC3506</b>   | <i>C. posadasii</i> | Coahuila, Mexico    | I. Gutierrez                         | UA             |
| <b>RMSCC3472</b>   | <i>C. posadasii</i> | Michoacán, Mexico   | I. Gutierrez                         | UA             |
| <b>RMSCC3474</b>   | <i>C. immitis</i>   | Michoacán, Mexico   | I. Gutierrez                         | UA             |



|                  |                     |                         |         |                                                                |               |
|------------------|---------------------|-------------------------|---------|----------------------------------------------------------------|---------------|
| <b>RMSCC3475</b> | <i>C. immitis</i>   | Michoacán,<br>Mexico    |         | I. Gutierrez                                                   | UA            |
| <b>RMSCC3476</b> | <i>C. immitis</i>   | Michoacán,<br>Mexico    |         | I. Gutierrez                                                   | UA            |
| <b>RMSCC3478</b> | <i>C. posadasii</i> | Michoacán,<br>Mexico    |         | I. Gutierrez                                                   | UA            |
| <b>RMSCC3479</b> | <i>C. immitis</i>   | Michoacán,<br>Mexico    |         | I. Gutierrez                                                   | UA            |
| <b>RMSCC3377</b> | <i>C. immitis</i>   | Monterey,<br>California |         | UCD                                                            | UA            |
| <b>RMSCC2343</b> | <i>C. posadasii</i> | Nuevo<br>Mexico         | Leon,   | R. Diaz                                                        | UA            |
| <b>RMSCC2346</b> | <i>C. posadasii</i> | Nuevo<br>Mexico         | Leon,   | R. Diaz                                                        | UA            |
| <b>RMSCC3738</b> | <i>C. posadasii</i> | Piaui, Brazil           |         | B. Wanke                                                       | UA            |
| <b>RMSCC3740</b> | <i>C. posadasii</i> | Piaui, Brazil           |         | B. Wanke                                                       | UA            |
| <b>RMSCC2127</b> | <i>C. posadasii</i> | Texas                   |         | UTHSC                                                          | UA            |
| <b>RMSCC2133</b> | <i>C. posadasii</i> | Texas                   |         | UTHSC                                                          | UA            |
| <b>RMSCC2234</b> | <i>C. posadasii</i> | Texas                   |         | UTHSC                                                          | UA            |
| <b>RMSCC2102</b> | <i>C. immitis</i>   | San<br>California       | Diego,  | University of California<br>San Diego (UCSD)<br>Medical Center | UA            |
| <b>RMSCC2394</b> | <i>C. immitis</i>   | San<br>California       | Diego,  | UCSD Medical Center                                            | UA            |
| <b>RMSCC2395</b> | <i>C. immitis</i>   | San<br>California       | Diego,  | UCSD Medical Center                                            | UA            |
| <b>RMSCC3693</b> | <i>C. immitis</i>   | San<br>California       | Diego,  | Naval Hospital                                                 | UA            |
| <b>RMSCC3703</b> | <i>C. immitis</i>   | San<br>California       | Diego,  | UCSD Medical Center                                            | UA            |
| <b>RMSCC3705</b> | <i>C. immitis</i>   | San<br>California       | Diego,  | UCSD Medical Center                                            | UA            |
| <b>RMSCC3706</b> | <i>C. immitis</i>   | San<br>California       | Diego,  | UCSD Medical Center                                            | UA            |
| <b>RMSCC2006</b> | <i>C. immitis</i>   | San<br>Valley           | Joaquin | Kern County Public<br>Health (KCPH)                            | UA            |
| <b>RMSCC2009</b> | <i>C. immitis</i>   | San<br>Valley           | Joaquin | KCPH                                                           | UA            |
| <b>RMSCC2010</b> | <i>C. immitis</i>   | San<br>Valley           | Joaquin | KCPH                                                           | UA and<br>NAU |
| <b>RMSCC2011</b> | <i>C. immitis</i>   | San<br>Valley           | Joaquin | KCPH                                                           | UA            |
| <b>RMSCC2012</b> | <i>C. immitis</i>   | San<br>Valley           | Joaquin | KCPH                                                           | UA            |
| <b>RMSCC2014</b> | <i>C. immitis</i>   | San<br>Valley           | Joaquin | KCPH                                                           | UA            |

|                  |                     |                 |         |              |    |
|------------------|---------------------|-----------------|---------|--------------|----|
| <b>RMSCC2015</b> | <i>C. immitis</i>   | San Valley      | Joaquin | KCPH         | UA |
| <b>RMSCC2017</b> | <i>C. immitis</i>   | San Valley      | Joaquin | KCPH         | UA |
| <b>RMSCC2268</b> | <i>C. immitis</i>   | San Valley      | Joaquin | KCPH         | UA |
| <b>RMSCC2269</b> | <i>C. immitis</i>   | San Valley      | Joaquin | KCPH         | UA |
| <b>RMSCC2271</b> | <i>C. immitis</i>   | San Valley      | Joaquin | KCPH         | UA |
| <b>RMSCC2273</b> | <i>C. immitis</i>   | San Valley      | Joaquin | KCPH         | UA |
| <b>RMSCC2274</b> | <i>C. immitis</i>   | San Valley      | Joaquin | KCPH         | UA |
| <b>RMSCC2275</b> | <i>C. immitis</i>   | San Valley      | Joaquin | KCPH         | UA |
| <b>RMSCC2276</b> | <i>C. immitis</i>   | San Valley      | Joaquin | KCPH         | UA |
| <b>RMSCC2277</b> | <i>C. immitis</i>   | San Valley      | Joaquin | KCPH         | UA |
| <b>RMSCC2278</b> | <i>C. immitis</i>   | San Valley      | Joaquin | KCPH         | UA |
| <b>RMSCC2279</b> | <i>C. immitis</i>   | San Valley      | Joaquin | KCPH         | UA |
| <b>RMSCC2280</b> | <i>C. immitis</i>   | San Valley      | Joaquin | KCPH         | UA |
| <b>RMSCC2281</b> | <i>C. immitis</i>   | San Valley      | Joaquin | KCPH         | UA |
| <b>RMSCC3480</b> | <i>C. posadasii</i> | Sonora, Mexico  |         | I. Gutierrez | UA |
| <b>RMSCC3487</b> | <i>C. posadasii</i> | Sonora, Mexico  |         | I. Gutierrez | UA |
| <b>RMSCC3488</b> | <i>C. posadasii</i> | Sonora, Mexico  |         | I. Gutierrez | UA |
| <b>RMSCC1040</b> | <i>C. posadasii</i> | Tucson, Arizona |         | UA           | UA |
| <b>RMSCC1043</b> | <i>C. posadasii</i> | Tucson, Arizona |         | UA           | UA |
| <b>RMSCC1044</b> | <i>C. posadasii</i> | Tucson, Arizona |         | UA           | UA |
| <b>RMSCC1045</b> | <i>C. posadasii</i> | Tucson, Arizona |         | UA           | UA |
| <b>RMSCC3796</b> | <i>C. posadasii</i> | Venezuela       |         | G. San-Blas  |    |

142 Observations were consistent between testing institutions, therefore data sets were  
143 combined (S1 Fig). Using a mixed effect linear model, we showed a significant species-  
144 specific difference for growth of the mycelial phase of the fungus based on temperature (Fig  
145 2 and Table 2). Table 2 summarizes the estimated colony diameter for each predictor (species,  
146 day, species per day), 95% confidence interval (CI), and p-value for each temperature specific  
147 model. The radial growth rates of the two species differed significantly ( $p < 0.001$ ) at 37°C. At  
148 this temperature, *C. posadasii* strains exhibited greater radial growth, with an increase in  
149 diameter at a rate of 1mm/day, reaching double the diameter of *C. immitis* by day 16 (Fig 2  
150 and Table 2). This was in contrast to growth at the lower temperature of 28°C, where *C.*  
151 *immitis* grew more quickly than *C. posadasii*, although the difference was not statistically  
152 significant (p-value = 0.072, Table 2). These findings were consistent for all days tested, and  
153 represent differential phenotypes for both species. Thus, our analysis indicates that high  
154 temperature is the important variable between species growth rate on solid media. This  
155 phenotypic difference supports the molecular phylogenetic species designation and may  
156 reflect adaptation of *C. immitis* to cooler environments, or possibly specific hosts.

157 **Fig 2. Radial growth rate of 85 isolates of *Coccidioides* demonstrates species-specific**  
158 **response to temperature.** Each line represents the mean diameter (y-axis) for each isolate in  
159 triplicate (46 *C. immitis* and 39 *C. posadasii*) at a given time point (x-axis). Dark lines  
160 represent mean growth rate of each species. Radial growth was measured at day 5, 7, 9, 12,  
161 14 and 16. There is a significant difference in growth rate (slope) in response to higher  
162 temperature between species of *Coccidioides*. The radial growth rate of *C. immitis* is  
163 decreased at a higher temperature 37°C (slope<sub>37</sub> = 0.64 mm/day; 95% C.I. 0.51-0.78)  
164 compared to *C. posadasii* (slope<sub>37</sub> = 1.82 mm/day; 95% C.I. 1.49-2.16). Both species appear

165 to tolerate 28°C and grow at a similar rate (*C. immitis* slope<sub>28</sub> = 3.73 mm/day; 95% C.I. 3.53-  
 166 3.92, *C. posadasii*, slope<sub>28</sub> = 3.47 mm/day; 95% C.I. 2.98-3.90).

167 **Table 2. Temperature Specific Linear Models for Radial Growth Rate at 28°C or 37°C.**

| <i>Predictors</i>                    | <b>Colony Diameter at 28°C</b> |               |          | <b>Colony Diameter at 37°C</b> |               |          |
|--------------------------------------|--------------------------------|---------------|----------|--------------------------------|---------------|----------|
|                                      | <i>Estimates</i>               | <i>95% CI</i> | <i>p</i> | <i>Estimates</i>               | <i>95% CI</i> | <i>p</i> |
| Species <i>C. immitis</i>            | 6.81                           | 6.45 – 7.17   | <0.001   | 6.11                           | 5.91 – 6.30   | <0.001   |
| Species <i>C. posadasii</i>          | 6.56                           | 6.17 – 6.95   | <0.001   | 6.09                           | 5.88 – 6.30   | <0.001   |
| Day                                  | 3.73                           | 3.53 – 3.92   | <0.001   | 0.64                           | 0.51 – 0.78   | <0.001   |
| Species ( <i>C. posadasii</i> x Day) | -0.26                          | 0.55 – 0.02   | 0.072    | 1.18                           | 0.98 – 1.38   | <0.001   |
| N <sup>a</sup>                       | 85                             |               |          | 85                             |               |          |

168 Summary of temperature specific linear models, for 28°C and 37°C, respectively. Colony  
 169 growth estimates for the predictors are species (y- intercept) and day (offset for y- intercept)  
 170 and species per day (slope). 95% confidence intervals (CI) for these estimates and p values  
 171 were used to compare each predictor. At 28°C, *C. posadasii* grows 0.26 mm slower per day  
 172 than *C. immitis*. The difference in slope is not significant (p= 0.072). At 37°C, *C. posadasii*  
 173 grows 1.18mm faster per day than *C. immitis*. The difference in slope (CI, 0.98-1.38 mm/day)  
 174 is statistically significant (p<0.001). <sup>a</sup>Number of individual strains.

## 175 **Discussion**

176           Although many studies have looked at genetic variation among isolates of both species  
177 of *Coccidioides*, few studies have compared phenotypic differences. Observed genetic  
178 diversity between and within species makes it reasonable to hypothesize that phenotypic  
179 variation exists. We propose that a methodical documentation of phenotypic variation is a  
180 necessary first step to determine the ecological or clinical relevance of these traits. In this  
181 study, we have identified a definitive phenotypic difference with a congruent analysis at two  
182 institutions for a diverse set of isolates. A total of 85 isolates covering the geographic range  
183 of both species show that *C. posadasii* isolates grow at a significantly faster rate ( $p < 0.001$ ,  
184 Fig 2 and Table 2) than *C. immitis* isolates in the mycelial form at 37°C on YE agar.  
185 Additionally, *C. immitis* grows slightly faster than *C. posadasii* at 28°C on YE agar although  
186 the difference in growth rate is not significant ( $p\text{-value} = 0.072$ , Fig 2 and Table 2). We note  
187 that growth rate may be influenced by nutrition source, and the results are limited to the media  
188 utilized for the current study.

189           Functionally, this phenotype is similar to a classic temperature sensitive (ts)  
190 conditional mutant, such that *C. immitis* exhibits normal growth at permissive temperature,  
191 and significantly slower growth under stressful conditions. It is possible that *C. immitis* could  
192 be restored to normal growth at 37°C by gene replacement with appropriate *C. posadasii*  
193 alleles if candidate genes were identified. Several genes and pathways have been described in  
194 *Aspergillus fumigatus* related to thermotolerance [51]. For example, the observed phenotype  
195 could be due to mutations in a heat shock protein (Hsp). Hsps are activated in response to  
196 changes in temperature and regulate cellular processes associated with morphogenesis,

197 antifungal resistance, and virulence by triggering a wide array of cellular signaling pathways  
198 [50, 59]. Hsps are activated by a heat shock transcription factor (Hsf) that acts as a  
199 thermosensor, regulating the Hsps at specific growth temperatures [60]. Several studies have  
200 shown that *Coccidioides* up-regulates heat shock proteins Hsp20 and Hsp9/12 at high  
201 temperature during the parasitic lifecycle while down-regulating Hsp30 and Hsp90 [61-64].  
202 Further investigation of Hsps and Hsfs in *Coccidioides* could elucidate mechanisms of the  
203 species-specific thermotolerant behavior observed in this study. Alternatively, many classical  
204 ts mutants occur in genes required for normal cellular growth and are due to single amino acid  
205 changes that affect protein function or stability at the restrictive temperature. For example, a  
206 number of colonial temperature sensitive (*cot*) mutants have been identified in *Neurospora*  
207 *crassa*. The *N. crassa cot-1* mutant has been studied in greatest detail, and the ts defect is due  
208 to a SNP causing a single amino acid change in a Ser/Thr protein kinase required for normal  
209 hyphal extension, thus resulting in restricted growth at normally permissive temperatures  
210 above 32°C [65, 66]. Finally, recent work in *Saccharomyces* indicates that mitochondrial  
211 genotypes are associated with heat tolerance [67]. The mitochondrial genomes of the two  
212 species of *Coccidioides* are also distinct, and thus mitochondrial function is another potential  
213 mechanism controlling thermotolerance in *Coccidioides*.

214         The source of the genotypic variation driving the observed phenotype may be  
215 attributable to a stochastic event, such as a founder effect or population bottleneck 10-12  
216 MYA, which is the estimated time the two species have been separated [5, 68]. Alternatively,  
217 the observed pattern may be due to selection pressure from a specific environment, host, or  
218 directly associated with virulence. Thus, the observed differential thermotolerance may relate  
219 to the saprobic phase of the lifecycle and reflect adaptation to specific environments. A pattern

220 of alternating wet-dry conditions has been related to Valley fever incidence across the  
221 southwestern U.S. [69-74]. It has been proposed that fungal growth occurs during brief periods  
222 of heavy moisture during monsoon and winter rainy seasons in the Southwest, which are  
223 followed by prolific conidia production when warm temperatures and low rainfall desiccate  
224 soils and increase dispersal via dust (the “grow and blow” hypothesis) [26, 70, 75].  
225 Additionally, during high temperature periods, it is hypothesized that the surface soil is  
226 partially sterilized and many competitors are removed, but *Coccidioides* spores remain viable  
227 [25]. Another hypothesis is that *C. posadasii* may be better adapted to growth in the high soil  
228 temperatures observed in the southwestern deserts compared to the California endemic *C.*  
229 *immitis*. Maricopa, Pinal and Pima counties harbor the highest coccidioidomycosis case rates  
230 in Arizona due to *C. posadasii*, and according to the National Centers for Environmental  
231 Information [76], the annual mean temperature (1901-2000) were 20.7°C, 19.8°C and 19.2°C,  
232 respectively. On the other hand, Fresno, King and Kern counties, which harbor the highest  
233 coccidioidomycosis case rates in California due to *C. immitis*, had annual mean temperatures  
234 of 12.4°C, 16.9°C and 15.8°C, respectively. The difference in 100-year average annual mean  
235 temperature between highly endemic areas of Arizona and California supports our hypothesis  
236 that *C. posadasii* is more adapted to higher temperatures compared to *C. immitis*.  
237 Alternatively, a preferred host species may vary in normal body temperature, in accordance  
238 with the endozoan small mammal reservoir hypothesis proposed by Barker and Taylor [77].  
239 Interestingly, a decline in mean human body temperature (~1.6%) has recently been reported  
240 [78]. Whether this impacts coccidioidomycosis rates is unknown.

241 Published literature to date suggests that disease outcomes are related primarily to  
242 host-specific factors [36, 37, 79], and certainly, host genetic background can impact disease

243 progression. We propose that pathogen-specific variation may also contribute to capricious  
244 disease outcomes in coccidioidomycosis patients. Currently, species-specific virulence is not  
245 well-documented in *Coccidioides* research, but has been suggested [1, 12]. This is in part due  
246 to the use of a few characterized laboratory strains of *Coccidioides* for most hypothesis testing,  
247 primarily strains Silveira, C735 and RS [61-64, 81-83]. Therefore, connecting phenotypic  
248 dissimilarity to established genetic variation using genome-wide association studies could  
249 provide insight into unique characteristics of these genetically distinct pathogens.

250 In summary, we have identified a significant phenotypic difference between *C. immitis*  
251 and *C. posadasii*. Although growth rate on YE media at two temperatures is the only  
252 characteristic we explicitly tested, there are certain to be more phenotypic differences between  
253 species, and possibly between populations. This, coupled with the recent availability of the  
254 genome sequence of multiple strains for both fungal species, may allow comparative genomic  
255 approaches to elucidate candidate genes for thermotolerance regulation in *Coccidioides* and  
256 closely related Onygenales [6].

## 257 **Methods**

258 **Strains and Media.** 39 *C. posadasii* strains and 46 *C. immitis* strains used in this study are  
259 primarily human patient isolates archived by various institutions, as detailed in Table 1 [5, 7,  
260 27, 84]. These strains represent both the full geographic range of the two species, and the  
261 proposed geographically distinct sub-populations [5, 7]. Strains were grown on 2xGYE media  
262 (2% glucose, 1% yeast extract, 1.5% agar w/v) to supply initial plugs to inoculate plates for  
263 growth analysis. Yeast Extract (YE) media (0.5% yeast extract, 1.5% agar w/v) was used for



264 growth experiments. Flagstaff Medical Center isolates were collected under IRB No. 764034  
265 through Northern Arizona Healthcare as part of the Northern Arizona University Biobank.

266 **Growth Conditions and Measurements.** Colonies were started by spreading approximately  
267  $10^6$  arthroconidia over the entire surface of a 2xGYE plate to create a lawn of mycelium to be  
268 transferred to initiate the thermotolerance experiment; this allowed measurement of colonial  
269 growth and not spore germination differences. After five days of growth at 25°C, 7mm  
270 diameter mycelial plugs were subcultured to the center of YE plates using a transfer tool  
271 (Transfertube® Disposable Harvesters, Spectrum® Laboratories). Three replicates of each  
272 strain were plated for each experiment. All plates (100mm x 15mm BD Falcon 1015) were  
273 sealed with gas permeable seals (labtape form TimeMed Labeling Systems, Inc or Key  
274 Scientific plate seals) for safety. Plates were placed in temperature-controlled incubators at  
275 either 28°C or 37°C in the dark under ambient humidity (30-50% RH) and CO<sub>2</sub> (0.1%)  
276 conditions. Plate stacks were rotated from top to bottom and repositioned in the incubator with  
277 each measurement timepoint to reduce effects of environmental variation within the  
278 incubators. For measurement of radial growth, the diameter of each colony was measured in  
279 mm at 5, 7, 9, 12, 14, and 16 days post-subculture. The initial experiment proceeded at  
280 University of Arizona (UA) and subsequent testing with a new set of isolates occurred at  
281 Northern Arizona University (NAU). Details for strains tested at each institution are listed in  
282 Table 1 and all raw measurement data are available in S1 File.

283 **Statistical Analysis.** To estimate the mean growth rate for each species over the two-week  
284 period a mixed effect linear model for each temperature was constructed using the lme4  
285 package in R version 3.6.2 [85, 86]. Initially, data sets were divided by institution and after  
286 concluding that parameters of interest were not impacted by collection site the data sets were

287 combined. In the temperature specific models, the factors “day” and “species” were assumed  
288 to be fixed linear effects, and individual isolate response for each day was considered to be a  
289 normally distributed random effect as appropriate in a longitudinal study. Thus, the response  
290 variable of colony diameter was modeled with fixed effects and a random effect to determine  
291 if growth rates varied between strains at either 28°C and 37°C. Shapiro-Wilk test (p-value <  
292 0.001) shows that residuals are not normally distributed. However, the large sample size and  
293 overall residual structure support that a linear model is the most appropriate for this data set.  
294 In addition, bootstrapping using the boot package in R [87, 88] was used to estimate 95%  
295 confidence intervals (CIs) for growth rates and other fixed effects (nsim=2,000). All bootstrap  
296 parameters were similar and support model estimates. A comparison between bootstrapped  
297 CIs and CIs constructed using the linear model can be found in S1 Table and S2 Table.

## 298 **Acknowledgements**

299 We are indebted to G. Koenig at Roche Molecular Systems for her assistance with obtaining  
300 several strains for phenotypic analysis. Special appreciation goes to E. Kellner, H. Paes and  
301 E. Temporini for their helpful suggestions.

302

## 303 **Supporting information**

304 **S1 Fig. Growth of *C. immitis* and *C. posadasii* on YE media at NAU and UA.** Seven mm  
305 diameter plugs were sub-cultured onto yeast extract plates and radial growth was documented  
306 over sixteen days. (A) Radial growth measurements at 28°C and 37°C for 85 isolates in

307 triplicate, at both institutions. (B) Representative samples of phenotypic variation observed  
308 between species on day sixteen for both NAU and UA experiments.

309

310 **S1 Table. Comparison of 28°C Linear Model and Bootstrap Values.** Comparison of 28°C  
311 linear model and bootstrap 95% confidence intervals. Bootstrapping conducted using the boot  
312 package in R.

313

314 **S2 Table. Comparison of 37°C Linear Model and Bootstrap Values.** Comparison of 37°C  
315 linear model and bootstrap 95% confidence intervals. Bootstrapping conducted using the boot  
316 package in R.

317

318 **S1 File. Final Raw Data for Temperature Differences at 37 °C and 28 °C.** Measurements  
319 (diameter in mm) for each isolate on each plate were recorded on days 5, 7, 9, 12, 14, and 16.  
320 Three replicates were completed for each strain for both temperature conditions. Strain details  
321 are listed in Table 1.

## 322 **References**

- 323 1. Cox RA, Magee DM. Coccidioidomycosis: host response and vaccine development.  
324 Clin Microbiol Rev. 2004;17(4):804-39. Epub 2004/10/19. doi: 10.1128/CMR.17.4.804-  
325 839.2004. PubMed PMID: 15489350; PubMed Central PMCID: PMCPMC523560.
- 326 2. Lewis ER, Bowers JR, Barker BM. Dust devil: the life and times of the fungus that  
327 causes valley fever. PLoS Pathog. 2015;11(5):e1004762. Epub 2015/05/15. doi:  
328 10.1371/journal.ppat.1004762. PubMed PMID: 25973899; PubMed Central PMCID:  
329 PMCPMC4431877.
- 330 3. Galgiani JN, Ampel NM, Catanzaro A, Johnson RH, Stevens DA, Williams PL.  
331 Practice guidelines for the treatment of coccidioidomycosis. Clin Infect Dis.  
332 2000;30(4):658-61. doi: Doi 10.1086/313747. PubMed PMID: WOS:000087009000010.
- 333 4. Freedman MB AS, Benedict K, McCotter O, Derado G, Hoekstra R, et al.  
334 Preliminary estimates of annual burden of coccidioidomycosis in the United States, 2010–  
335 2014. In: Proceedings of the Coccidioidomycosis Study Group 61st Annual Meeting in  
336 collaboration with the 7th International Coccidioidomycosis Symposium; August 10-13;  
337 Palo Alto CA. Stanford CA: Coccidioidomycosis Study Group Website; 2017. p. 32.
- 338 5. Fisher MC, Koenig GL, White TJ, Taylor JW. Molecular and phenotypic description  
339 of *Coccidioides posadasii* sp. nov., previously recognized as the non-California population  
340 of *Coccidioides immitis*. Mycologia. 2002;94(1):73-84. Epub 2002/01/01. PubMed PMID:  
341 21156479.

342 6. Engelthaler DM, Roe CC, Hepp CM, Teixeira M, Driebe EM, Schupp JM, et al.  
343 Local population structure and patterns of western hemisphere dispersal for *Coccidioides*  
344 spp., the fungal cause of valley fever. *mBio*. 2016;7(2):e00550-16. Epub 2016/04/28. doi:  
345 10.1128/mBio.00550-16. PubMed PMID: 27118594; PubMed Central PMCID:  
346 PMCPMC4850269.

347 7. Teixeira MM, Barker BM. Use of population genetics to assess the ecology,  
348 evolution, and population structure of *Coccidioides*. *Emerg Infect Dis*. 2016;22(6):1022-30.  
349 Epub 2016/05/19. doi: 10.3201/eid2206.151565. PubMed PMID: 27191589; PubMed  
350 Central PMCID: PMCPMC4880095.

351 8. Maxwell CS, Mattox K, Turissini DA, Teixeira MM, Barker BM, Matute DR. Gene  
352 exchange between two divergent species of the fungal human pathogen, *Coccidioides*.  
353 *Evolution*. 2019;73(1):42-58. Epub 2018/11/11. doi: 10.1111/evo.13643. PubMed PMID:  
354 30414183; PubMed Central PMCID: PMCPMC6430640.

355 9. Teixeira MM, Alvarado P, Roe CC, Thompson GR, 3rd, Patane JSL, Sahl JW, et al.  
356 Population structure and genetic diversity among isolates of *Coccidioides posadasii* in  
357 Venezuela and surrounding regions. *mBio*. 2019;10(6). Epub 2019/11/28. doi:  
358 10.1128/mBio.01976-19. PubMed PMID: 31772050; PubMed Central PMCID:  
359 PMCPMC6879716.

360 10. Neafsey DE, Barker BM, Sharpton TJ, Stajich JE, Park DJ, Whiston E, et al.  
361 Population genomic sequencing of *Coccidioides* fungi reveals recent hybridization and  
362 transposon control. *Genome Res*. 2010;20(7):938-46. Epub 2010/06/03. doi:

363 10.1101/gr.103911.109. PubMed PMID: 20516208; PubMed Central PMCID:  
364 PMCPMC2892095.

365 11. Mead HL, Teixeira MM, Galgiani JN, Barker BM. Characterizing in vitro spherule  
366 morphogenesis of multiple strains of both species of *Coccidioides*. *Med Mycol*.  
367 2019;57(4):478-88. Epub 2018/07/28. doi: 10.1093/mmy/myy049. PubMed PMID:  
368 30053114; PubMed Central PMCID: PMCPMC6506604.

369 12. Lewis ER, David VR, Doyle AL, Rajabi K, Kiefer JA, Pirrotte P, et al. Differences  
370 in host innate responses among *Coccidioides* isolates in a murine model of pulmonary  
371 coccidioidomycosis. *Eukaryot Cell*. 2015;14(10):1043-53. Epub 2015/08/16. doi:  
372 10.1128/EC.00122-15. PubMed PMID: 26275879; PubMed Central PMCID:  
373 PMCPMC4588628.

374 13. Friedman L, Smith CE. The comparison of four strains of *Coccidioides immitis* with  
375 diverse histories. *Mycopathol Mycol Appl*. 1957;8(1):47-53. Epub 1957/03/25. PubMed  
376 PMID: 13430697.

377 14. Berman RJ, Friedman L, Pappagianis D, Smith CE. Survival of *Coccidioides immitis*  
378 under controlled conditions of temperature and humidity. *Am J Public Health Nations*  
379 *Health*. 1956;46(10):1317-24. Epub 1956/10/01. doi: 10.2105/ajph.46.10.1317. PubMed  
380 PMID: 13362665; PubMed Central PMCID: PMCPMC1624071.

- 381 15. Berman RJ, Friedman L, Roessler WG, Smith CE. The virulence and infectivity of  
382 twenty-seven strains of *Coccidioides immitis*. Am J Hyg. 1956;64(2):198-210. Epub  
383 1956/09/01. doi: 10.1093/oxfordjournals.aje.a119834. PubMed PMID: 13362231.
- 384 16. Friedman L, Smith CE, Gordon LE. The assay of virulence of *Coccidioides* in white  
385 mice. J Infec Dis. 1955;97(3):311-6. Epub 1955/11/01. PubMed PMID: 13286489.
- 386 17. Huppert M, Walker LJ. The selective and differential effects of cycloheximide on  
387 many strains of *Coccidioides immitis*. Am J Clin Pathol. 1958;29(3):291-5. Epub  
388 1958/03/01. PubMed PMID: 13520665.
- 389 18. Egeberg RO, Elconin AE, Egeberg MC. Effect of salinity and temperature on  
390 *Coccidioides immitis* and three antagonistic soil saprophytes. J Bacteriol. 1964;88:473-6.  
391 Epub 1964/08/01. PubMed PMID: 14203366; PubMed Central PMCID: PMCPMC277324.
- 392 19. Egeberg RO, Ely AF. *Coccidioides immitis* in the soil of the southern San Joaquin  
393 Valley. Am J Med Sci. 1956;231(2):151-4. Epub 1956/02/01. PubMed PMID: 13282896.
- 394 20. Elconin AF, Egeberg RO, Egeberg MC. Significance of soil salinity on the ecology  
395 of *Coccidioides immitis*. J Bacteriol. 1964;87:500-3. Epub 1964/03/01. PubMed PMID:  
396 14127564; PubMed Central PMCID: PMCPMC277045.
- 397 21. CW Emmons LA. The isolation of *Haplosporangium parvum n. sp.* and  
398 *Coccidioides immitis* from wild rodents. Their relationship to coccidioidomycosis. Public  
399 Health Rep. 1942;57(46):14715-27.

- 400 22. Emmons C. Isolation of *Coccidioides* from soil and rodents. Public Health Reports.  
401 1942;57(4):109-11.
- 402 23. Maddy KT. The geographic distribution of *Coccidioides immitis* and possible  
403 ecologic implications. Ariz Med. 1958;15(3):178-88. Epub 1958/03/01. PubMed PMID:  
404 13510095.
- 405 24. Maddy KT CH. Establishment of *Coccidioides immitis* in negative soil following  
406 burial of infected animal tissues. The Second Symposium on Coccidioidomycosis.  
407 1965:309-12.
- 408 25. Maddy KT. Observations on *Coccidioides immitis* found growing naturally in soil.  
409 Ariz Med. 1965;22:281-8. Epub 1965/04/01. PubMed PMID: 14262164.
- 410 26. Gorris ME, Treseder KK, Zender CS, Randerson JT. Expansion of  
411 coccidioidomycosis endemic regions in the United States in response to climate change.  
412 Geohealth. 2019;3(10):308-27. Epub 2020/03/12. doi: 10.1029/2019GH000209. PubMed  
413 PMID: 32159021; PubMed Central PMCID: PMC7007157.
- 414 27. Barker BM, Tabor JA, Shubitz LF, Perrill R, Orbach MJ. Detection and phylogenetic  
415 analysis of *Coccidioides posadasii* in Arizona soil samples. Fungal Ecol. 2012;5(2):163-76.  
416 doi: 10.1016/j.funeco.2011.07.010.
- 417 28. Barker BM, Litvintseva AP, Riquelme M, Vargas-Gastelum L. *Coccidioides*  
418 ecology and genomics. Med Mycol. 2019;57(Supplement\_1):S21-S9. Epub 2019/01/29.



419 doi: 10.1093/mmy/myy051. PubMed PMID: 30690605; PubMed Central PMCID:  
420 PMCPMC6347077.

421 29. Luna-Isaac JA, Muniz-Salazar R, Baptista-Rosas RC, Enriquez-Paredes LM,  
422 Castanon-Olivares LR, Contreras-Perez C, et al. Genetic analysis of the endemic fungal  
423 pathogens *Coccidioides posadasii* and *Coccidioides immitis* in Mexico. *Med Mycol.*  
424 2014;52(2):156-66. Epub 2014/03/01. doi: 10.1093/mmy/myt005. PubMed PMID:  
425 24577001.

426 30. McGinnis MR, Smith MB, Hinson E. Use of the *Coccidioides posadasii*  $\Delta$ chs5 strain  
427 for quality control in the ACCUPROBE culture identification test for *Coccidioides immitis*.  
428 *J Clin Microbiol.* 2006;44(11):4250-1. Epub 2006/11/08. doi: 10.1128/JCM.01265-06.  
429 PubMed PMID: 17088372; PubMed Central PMCID: PMCPMC1698319.

430 31. Litvintseva AP, Marsden-Haug N, Hurst S, Hill H, Gade L, Driebe EM, et al. Valley  
431 fever: finding new places for an old disease: *Coccidioides immitis* found in Washington  
432 State soil associated with recent human infection. *Clin Infect Dis.* 2015;60(1):e1-3. Epub  
433 2014/08/29. doi: 10.1093/cid/ciu681. PubMed PMID: 25165087; PubMed Central PMCID:  
434 PMCPMC4296125.

435 32. Bowers JR, Parise KL, Kelley EJ, Lemmer D, Schupp JM, Driebe EM, et al. Direct  
436 detection of *Coccidioides* from Arizona soils using CoccoiENV, a highly sensitive and  
437 specific real-time PCR assay. *Med Mycol.* 2019;57(2):246-55. doi: 10.1093/mmy/myy007.  
438 PubMed PMID: WOS:000462493400012.

- 439 33. Sheff KW, York ER, Driebe EM, Barker BM, Rounsley SD, Waddell VG, et al.  
440 Development of a rapid, cost-effective TaqMan Real-Time PCR assay for identification and  
441 differentiation of *Coccidioides immitis* and *Coccidioides posadasii*. *Med Mycol.*  
442 2010;48(3):466-9. Epub 2010/04/08. doi: 10.3109/13693780903218990. PubMed PMID:  
443 20370360.
- 444 34. Hamm PS, Hutchison MI, Leonard P, Melman S, Natvig DO. First analysis of  
445 human *Coccidioides* isolates from New Mexico and the southwest four corners region:  
446 Implications for the distributions of *C. posadasii* and *C. immitis* and human groups at risk.  
447 *J Fungi (Basel)*. 2019;5(3). Epub 2019/08/14. doi: 10.3390/jof5030074. PubMed PMID:  
448 31405105; PubMed Central PMCID: PMC6787932.
- 449 35. Thompson GR, 3rd. Pulmonary coccidioidomycosis. *Semin Respir Crit Care Med.*  
450 2011;32(6):754-63. Epub 2011/12/15. doi: 10.1055/s-0031-1295723. PubMed PMID:  
451 22167403.
- 452 36. Odio CD, Marciano BE, Galgiani JN, Holland SM. Risk factors for disseminated  
453 coccidioidomycosis, United States. *Emerg Infect Dis.* 2017;23(2). doi:  
454 10.3201/eid2302.160505. PubMed PMID: 28098554.
- 455 37. Galgiani JN. How does genetics influence Valley Fever? Research underway now to  
456 answer this question. *Southwest Journal of Pulmonary and Critical Care.* 2014;9(4):230-7.  
457 doi: <http://dx.doi.org/10.13175/swjpcc137-14>.

- 458 38. Shubitz LF, Powell DA, Butkiewicz CD, Lewis ML, Trinh HT, Frelinger JA, et al.  
459 A chronic murine disease model of coccidioidomycosis using *Coccidioides posadasii*, strain  
460 1038. J Infect Dis. 2020. Epub 2020/07/14. doi: 10.1093/infdis/jiaa419. PubMed PMID:  
461 32658292.
- 462 39. Davis KM. All *Yersinia* are not created equal: Phenotypic adaptation to distinct  
463 niches within mammalian tissues. Front Cell Infect Microbiol. 2018;8:261. Epub  
464 2018/08/22. doi: 10.3389/fcimb.2018.00261. PubMed PMID: 30128305; PubMed Central  
465 PMCID: PMC6088192.
- 466 40. Phan HT, Rybak K, Furuki E, Breen S, Solomon PS, Oliver RP, et al. Differential  
467 effector gene expression underpins epistasis in a plant fungal disease. Plant J.  
468 2016;87(4):343-54. Epub 2016/05/03. doi: 10.1111/tpj.13203. PubMed PMID: 27133896;  
469 PubMed Central PMCID: PMC6053286.
- 470 41. Abdelsamed H, Peters J, Byrne GI. Genetic variation in *Chlamydia trachomatis* and  
471 their hosts: impact on disease severity and tissue tropism. Future Microbiol. 2013;8(9):1129-  
472 46. Epub 2013/09/12. doi: 10.2217/fmb.13.80. PubMed PMID: 24020741; PubMed Central  
473 PMCID: PMC4009991.
- 474 42. Freguja R, Gianesin K, Zanchetta M, De Rossi A. Cross-talk between virus and host  
475 innate immunity in pediatric HIV-1 infection and disease progression. New Microbiol.  
476 2012;35(3):249-57. Epub 2012/07/31. PubMed PMID: 22842595.

- 477 43. Perini L, Mogrovejo DC, Tomazin R, Gostincar C, Brill FHH, Gunde-Cimerman N.  
478 Phenotypes associated with pathogenicity: Their expression in Arctic fungal isolates.  
479 *Microorganisms*. 2019;7(12). Epub 2019/11/27. doi: 10.3390/microorganisms7120600.  
480 PubMed PMID: 31766661; PubMed Central PMCID: PMC6955883.
- 481 44. Williams-Rhaesa AM, Awuku NK, Lipscomb GL, Poole FL, Rubinstein GM,  
482 Conway JM, et al. Native xylose-inducible promoter expands the genetic tools for the  
483 biomass-degrading, extremely thermophilic bacterium *Caldicellulosiruptor bescii*.  
484 *Extremophiles*. 2018;22(4):629-38. Epub 2018/05/26. doi: 10.1007/s00792-018-1023-x.  
485 PubMed PMID: 29797090.
- 486 45. den Besten HMW, Wells-Bennik MHJ, Zwietering MH. Natural diversity in heat  
487 resistance of bacteria and bacterial spores: Impact on food safety and quality. *Annu Rev*  
488 *Food Sci Technol*. 2018;9:383-410. Epub 2018/03/28. doi: 10.1146/annurev-food-030117-  
489 012808. PubMed PMID: 29580137.
- 490 46. Barzkar N, Homaei A, Hemmati R, Patel S. Thermostable marine microbial  
491 proteases for industrial applications: scopes and risks. *Extremophiles*. 2018;22(3):335-46.  
492 Epub 2018/02/15. doi: 10.1007/s00792-018-1009-8. PubMed PMID: 29442247.
- 493 47. Choi DH, Park EH, Kim MD. Isolation of thermotolerant yeast *Pichia kudriavzevii*  
494 from Nuruk. *Food Sci Biotechnol*. 2017;26(5):1357-62. Epub 2018/09/29. doi:  
495 10.1007/s10068-017-0155-6. PubMed PMID: 30263670; PubMed Central PMCID:  
496 PMC6049779.

- 497 48. Kamthan A, Kamthan M, Datta A. Expression of C-5 sterol desaturase from an  
498 edible mushroom in fission yeast enhances its ethanol and thermotolerance. PLoS One.  
499 2017;12(3):e0173381. Epub 2017/03/10. doi: 10.1371/journal.pone.0173381. PubMed  
500 PMID: 28278249; PubMed Central PMCID: PMC5344387.
- 501 49. Matsushita K, Azuma Y, Kosaka T, Yakushi T, Hoshida H, Akada R, et al. Genomic  
502 analyses of thermotolerant microorganisms used for high-temperature fermentations. Biosci  
503 Biotechnol Biochem. 2016;80(4):655-68. Epub 2015/11/14. doi:  
504 10.1080/09168451.2015.1104235. PubMed PMID: 26566045.
- 505 50. Reidy M, Sharma R, Shastry S, Roberts BL, Albino-Flores I, Wickner S, et al.  
506 Hsp40s specify functions of Hsp104 and Hsp90 protein chaperone machines. PLoS Genet.  
507 2014;10(10):e1004720. Epub 2014/10/21. doi: 10.1371/journal.pgen.1004720. PubMed  
508 PMID: 25329162; PubMed Central PMCID: PMC4199505.
- 509 51. Bhabhra R, Askew DS. Thermotolerance and virulence of *Aspergillus fumigatus*:  
510 role of the fungal nucleolus. Med Mycol. 2005;43 Suppl 1:S87-93. Epub 2005/08/23. doi:  
511 10.1080/13693780400029486. PubMed PMID: 16110798.
- 512 52. Robert VA, Casadevall A. Vertebrate endothermy restricts most fungi as potential  
513 pathogens. J Infect Dis. 2009;200(10):1623-6. Epub 2009/10/16. doi: 10.1086/644642.  
514 PubMed PMID: 19827944.

515 53. Casadevall A, Steenbergen JN, Nosanchuk JD. 'Ready made' virulence and 'dual use'  
516 virulence factors in pathogenic environmental fungi--the *Cryptococcus neoformans*  
517 paradigm. Curr Opin Microbiol. 2003;6(4):332-7. PubMed PMID: 12941400.

518 54. Denham ST, Wambaugh MA, Brown JCS. How environmental fungi cause a range  
519 of clinical outcomes in susceptible hosts. J Mol Biol. 2019;431(16):2982-3009. Epub  
520 2019/05/13. doi: 10.1016/j.jmb.2019.05.003. PubMed PMID: 31078554; PubMed Central  
521 PMCID: PMC6646061.

522 55. Del Rocio Reyes-Montes M, Perez-Huitron MA, Ocana-Monroy JL, Frias-De-Leon  
523 MG, Martinez-Herrera E, Arenas R, et al. The habitat of *Coccidioides* spp. and the role of  
524 animals as reservoirs and disseminators in nature. BMC Infect Dis. 2016;16(1):550. Epub  
525 2016/10/12. doi: 10.1186/s12879-016-1902-7. PubMed PMID: 27724885; PubMed Central  
526 PMCID: PMC5057265.

527 56. Shubitz LF. Comparative aspects of coccidioidomycosis in animals and humans.  
528 Ann NY Acad Sci. 2007;1111:395-403. Epub 2007/03/03. doi: 10.1196/annals.1406.007.  
529 PubMed PMID: 17332082.

530 57. Eulalio KD, de Macedo RL, Cavalcanti MA, Martins LM, Lazera MS, Wanke B.  
531 *Coccidioides immitis* isolated from armadillos (*Dasypus novemcinctus*) in the state of Piauí,  
532 northeast Brazil. Mycopathologia. 2001;149(2):57-61. Epub 2001/03/29. PubMed PMID:  
533 11270394.

534 58. Swatek FE, Plunkett OA, editors. Experimental infections of wild rodents and  
535 animals other than mammals. Proceedings of the First Symposium on Coccidiomycosis;  
536 1957; Phoenix, AZ: University of Arizona Press.

537 59. Tiwari S, Thakur R, Shankar J. Role of heat-shock proteins in cellular function and  
538 in the biology of fungi. *Biotechnol Res Int*. 2015;2015:132635. Epub 2016/02/18. doi:  
539 10.1155/2015/132635. PubMed PMID: 26881084; PubMed Central PMCID:  
540 PMC4736001.

541 60. Brown AJ, Leach MD, Nicholls S. The relevance of heat shock regulation in fungal  
542 pathogens of humans. *Virulence*. 2010;1(4):330-2. Epub 2010/12/24. doi:  
543 10.4161/viru.1.4.12364. PubMed PMID: 21178465; PubMed Central PMCID:  
544 PMC3073299.

545 61. Viriyakosol S, Singhanian A, Fierer J, Goldberg J, Kirkland TN, Woelk CH. Gene  
546 expression in human fungal pathogen *Coccidioides immitis* changes as arthroconidia  
547 differentiate into spherules and mature. *BMC Microbiol*. 2013;13:121. Epub 2013/05/30.  
548 doi: 10.1186/1471-2180-13-121. PubMed PMID: 23714098; PubMed Central PMCID:  
549 PMC3693894.

550 62. Whiston E, Zhang Wise H, Sharpton TJ, Jui G, Cole GT, Taylor JW. Comparative  
551 transcriptomics of the saprobic and parasitic growth phases in *Coccidioides spp*. *PLoS One*.  
552 2012;7(7):e41034. Epub 2012/08/23. doi: 10.1371/journal.pone.0041034. PubMed PMID:  
553 22911737; PubMed Central PMCID: PMC3401177.

- 554 63. Mead HL, Roe CC, Higgins Kepler EA, Van Dyke MCC, Laux KL, Funke AL, et  
555 al. Defining critical genes during spherule remodeling and endospore development in the  
556 fungal pathogen, *Coccidioides posadasii*. *Front. Genet.*  
557 2020;11:483. <https://doi.org/10.3389/fgene.2020.00483>. PubMed PMID: 32499817;  
558 PubMed Central PMCID: PMC7243461.
- 559 64. Narra HP, Shubitz LF, Mandel MA, Trinh HT, Griffin K, Buntzman AS, et al. A  
560 *Coccidioides posadasii* CPS1 deletion mutant is avirulent and protects mice from lethal  
561 infection. *Infect Immun.* 2016;84(10):3007-16. Epub 2016/08/03. doi: 10.1128/IAI.00633-  
562 16. PubMed PMID: 27481239; PubMed Central PMCID: PMC5038059.
- 563 65. Gorovits R, Propheta O, Kolot M, Dombradi V, Yarden O. A mutation within the  
564 catalytic domain of COT1 kinase confers changes in the presence of two COT1 isoforms  
565 and in Ser/Thr protein kinase and phosphatase activities in *Neurospora crassa*. *Fungal Genet*  
566 *Biol.* 1999;27(2-3):264-74. Epub 1999/08/12. doi: 10.1006/fgbi.1999.1152. PubMed PMID:  
567 10441452.
- 568 66. Yarden O, Plamann M, Ebbole DJ, Yanofsky C. *cot-1*, a gene required for hyphal  
569 elongation in *Neurospora crassa*, encodes a protein kinase. *EMBO J.* 1992;11(6):2159-66.  
570 Epub 1992/06/01. PubMed PMID: 1534751; PubMed Central PMCID: PMC556683.
- 571 67. Li XC, Peris D, Hittinger CT, Sia EA, Fay JC. Mitochondria-encoded genes  
572 contribute to evolution of heat and cold tolerance in yeast. *Sci Adv.* 2019;5(1):eaav1848.  
573 Epub 2019/02/08. doi: 10.1126/sciadv.aav1848. PubMed PMID: 30729162; PubMed  
574 Central PMCID: PMC6353624.



575 68. Fisher MC, Koenig GL, White TJ, San-Blas G, Negroni R, Alvarez IG, et al.  
576 Biogeographic range expansion into South America by *Coccidioides immitis* mirrors New  
577 World patterns of human migration. Proc Natl Acad Sci U S A. 2001;98(8):4558-62. Epub  
578 2001/04/05. doi: 10.1073/pnas.071406098. PubMed PMID: 11287648; PubMed Central  
579 PMCID: PMCPMC31873.

580 69. Park BJ, Sigel K, Vaz V, Komatsu K, McRill C, Phelan M, et al. An epidemic of  
581 coccidioidomycosis in Arizona associated with climatic changes, 1998-2001. J Infect Dis.  
582 2005;191(11):1981-7. Epub 2005/05/05. doi: 10.1086/430092. PubMed PMID: 15871133.

583 70. Kolivras KN, Comrie AC. Modeling valley fever (coccidioidomycosis) incidence on  
584 the basis of climate conditions. Int J Biometeorol. 2003;47(2):87-101. Epub 2003/03/21.  
585 doi: 10.1007/s00484-002-0155-x. PubMed PMID: 12647095.

586 71. Gorris ME, Cat LA, Zender CS, Treseder KK, Randerson JT. Coccidioidomycosis  
587 dynamics in relation to climate in the southwestern United States. Geohealth. 2018;2(1):6-  
588 24. Epub 2018/01/15. doi: 10.1002/2017GH000095. PubMed PMID: 32158997; PubMed  
589 Central PMCID: PMCPMC7007142.

590 72. Coopersmith EJ, Bell JE, Benedict K, Shriber J, McCotter O, Cosh MH. Relating  
591 coccidioidomycosis (valley fever) incidence to soil moisture conditions. Geohealth.  
592 2017;1:51-63. Epub 2017/11/11. doi: 10.1002/2016GH000033. PubMed PMID: 29124249;  
593 PubMed Central PMCID: PMCPMC5672948.

594 73. Comrie AC. Climate factors influencing coccidioidomycosis seasonality and  
595 outbreaks. *Environ Health Perspect.* 2005;113(6):688-92. Epub 2005/06/03. doi:  
596 10.1289/ehp.7786. PubMed PMID: 15929890; PubMed Central PMCID:  
597 PMCPMC1257592.

598 74. Centers for Disease Control and Prevention. Increase in reported  
599 coccidioidomycosis--United States, 1998-2011. *MMWR Morb Mortal Wkly Rep.*  
600 2013;62(12):217-21. Epub 2013/03/29. PubMed PMID: 23535687; PubMed Central  
601 PMCID: PMCPMC4605002.

602 75. Maddy KT, Coccozza J. The probable geographic distribution of *Coccidioides*  
603 *immitis* in Mexico. *Bol Oficina Sanit Panam.* 1964;57:44-54. Epub 1964/07/01. PubMed  
604 PMID: 14175564.

605 76. NOAA National Centers for Environmental information, Climate at a Glance:  
606 County Mapping [Internet]. [cited 5/5/2020]. Available from:  
607 <https://www.ncdc.noaa.gov/cag/>.

608 77. Taylor JW, Barker BM. The endozoan, small-mammal reservoir hypothesis and the  
609 life cycle of *Coccidioides* species. *Med Mycol.* 2019;57(Supplement\_1):S16-S20. Epub  
610 2019/01/29. doi: 10.1093/mmy/myy039. PubMed PMID: 30690603; PubMed Central  
611 PMCID: PMCPMC6702415.

612 78. Protsiv M, Ley C, Lankester J, Hastie T, Parsonnet J. Decreasing human body  
613 temperature in the United States since the industrial revolution. *Elife.* 2020;9. Epub

614 2020/01/08. doi: 10.7554/eLife.49555. PubMed PMID: 31908267; PubMed Central  
615 PMCID: PMC6946399.

616 79. Sampaio EP, Hsu AP, Pechacek J, Bax HI, Dias DL, Paulson ML, et al. Signal  
617 transducer and activator of transcription 1 (STAT1) gain-of-function mutations and  
618 disseminated coccidioidomycosis and histoplasmosis. *J Allergy Clin Immunol.*  
619 2013;131(6):1624-34. Epub 2013/04/02. doi: 10.1016/j.jaci.2013.01.052. PubMed PMID:  
620 23541320; PubMed Central PMCID: PMC3746066.

621 80. Gonzalez A, Hung CY, Cole GT. *Coccidioides* releases a soluble factor that  
622 suppresses nitric oxide production by murine primary macrophages. *Microb Pathog.*  
623 2011;50(2):100-8. doi: 10.1016/j.micpath.2010.11.006. PubMed PMID:  
624 WOS:000286951700006.

625 81. Hung CY, Zhang H, Castro-Lopez N, Ostroff GR, Khoshlenar P, Abraham A, et al.  
626 Glucan-chitin particles enhance Th17 response and improve protective efficacy of a  
627 multivalent antigen (rCpa1) against pulmonary *Coccidioides posadasii* infection. *Infect*  
628 *Immun.* 2018;86(11). doi: 10.1128/iai.00070-18. PubMed PMID: 30104216.

629 82. Kirkland TN, Fierer J. *Coccidioides immitis* and *posadasii*; A review of their  
630 biology, genomics, pathogenesis, and host immunity. *Virulence.* 92018. p. 1426-35.

631 83. Viriyakosol S, Kapoor M, Okamoto S, Covell J, Soltow QA, Trzoss M, et al. APX001  
632 and other Gwt1 inhibitor prodrugs are effective in experimental *Coccidioides immitis*  
633 pneumonia. *Antimicrob Agents Chemother.* 2019;63(2). Epub 2018/11/21. doi:

634 10.1128/AAC.01715-18. PubMed PMID: 30455238; PubMed Central PMCID:  
635 PMCPMC6355600.

636 84. Burt A, Carter DA, Koenig GL, White TJ, Taylor JW. Molecular markers reveal  
637 cryptic sex in the human pathogen *Coccidioides immitis*. Proc Natl Acad Sci U S A.  
638 1996;93(2):770-3. Epub 1996/01/23. doi: 10.1073/pnas.93.2.770. PubMed PMID: 8570632;  
639 PubMed Central PMCID: PMCPMC40130.

640 85. Bates D, Machler M, Bolker BM, Walker SC. Fitting Linear Mixed-Effects Models  
641 Using lme4. J of Stat Software. 2015;67(1):1-48. doi: DOI 10.18637/jss.v067.i01. PubMed  
642 PMID: WOS:000365981400001.

643 86. Team RC. R: A Language and Environment for Statistical Computing. 2020.

644 87. Canty AR, BD. boot: Bootstrap R (S-Plus) Functions. R package version 1.3-24.  
645 2019.

646 88. Davison AC, Hinkley DV. Bootstrap methods and their application. Cambridge ;  
647 New York, NY, USA: Cambridge University Press; 1997. x, 582 p. p.

648

649

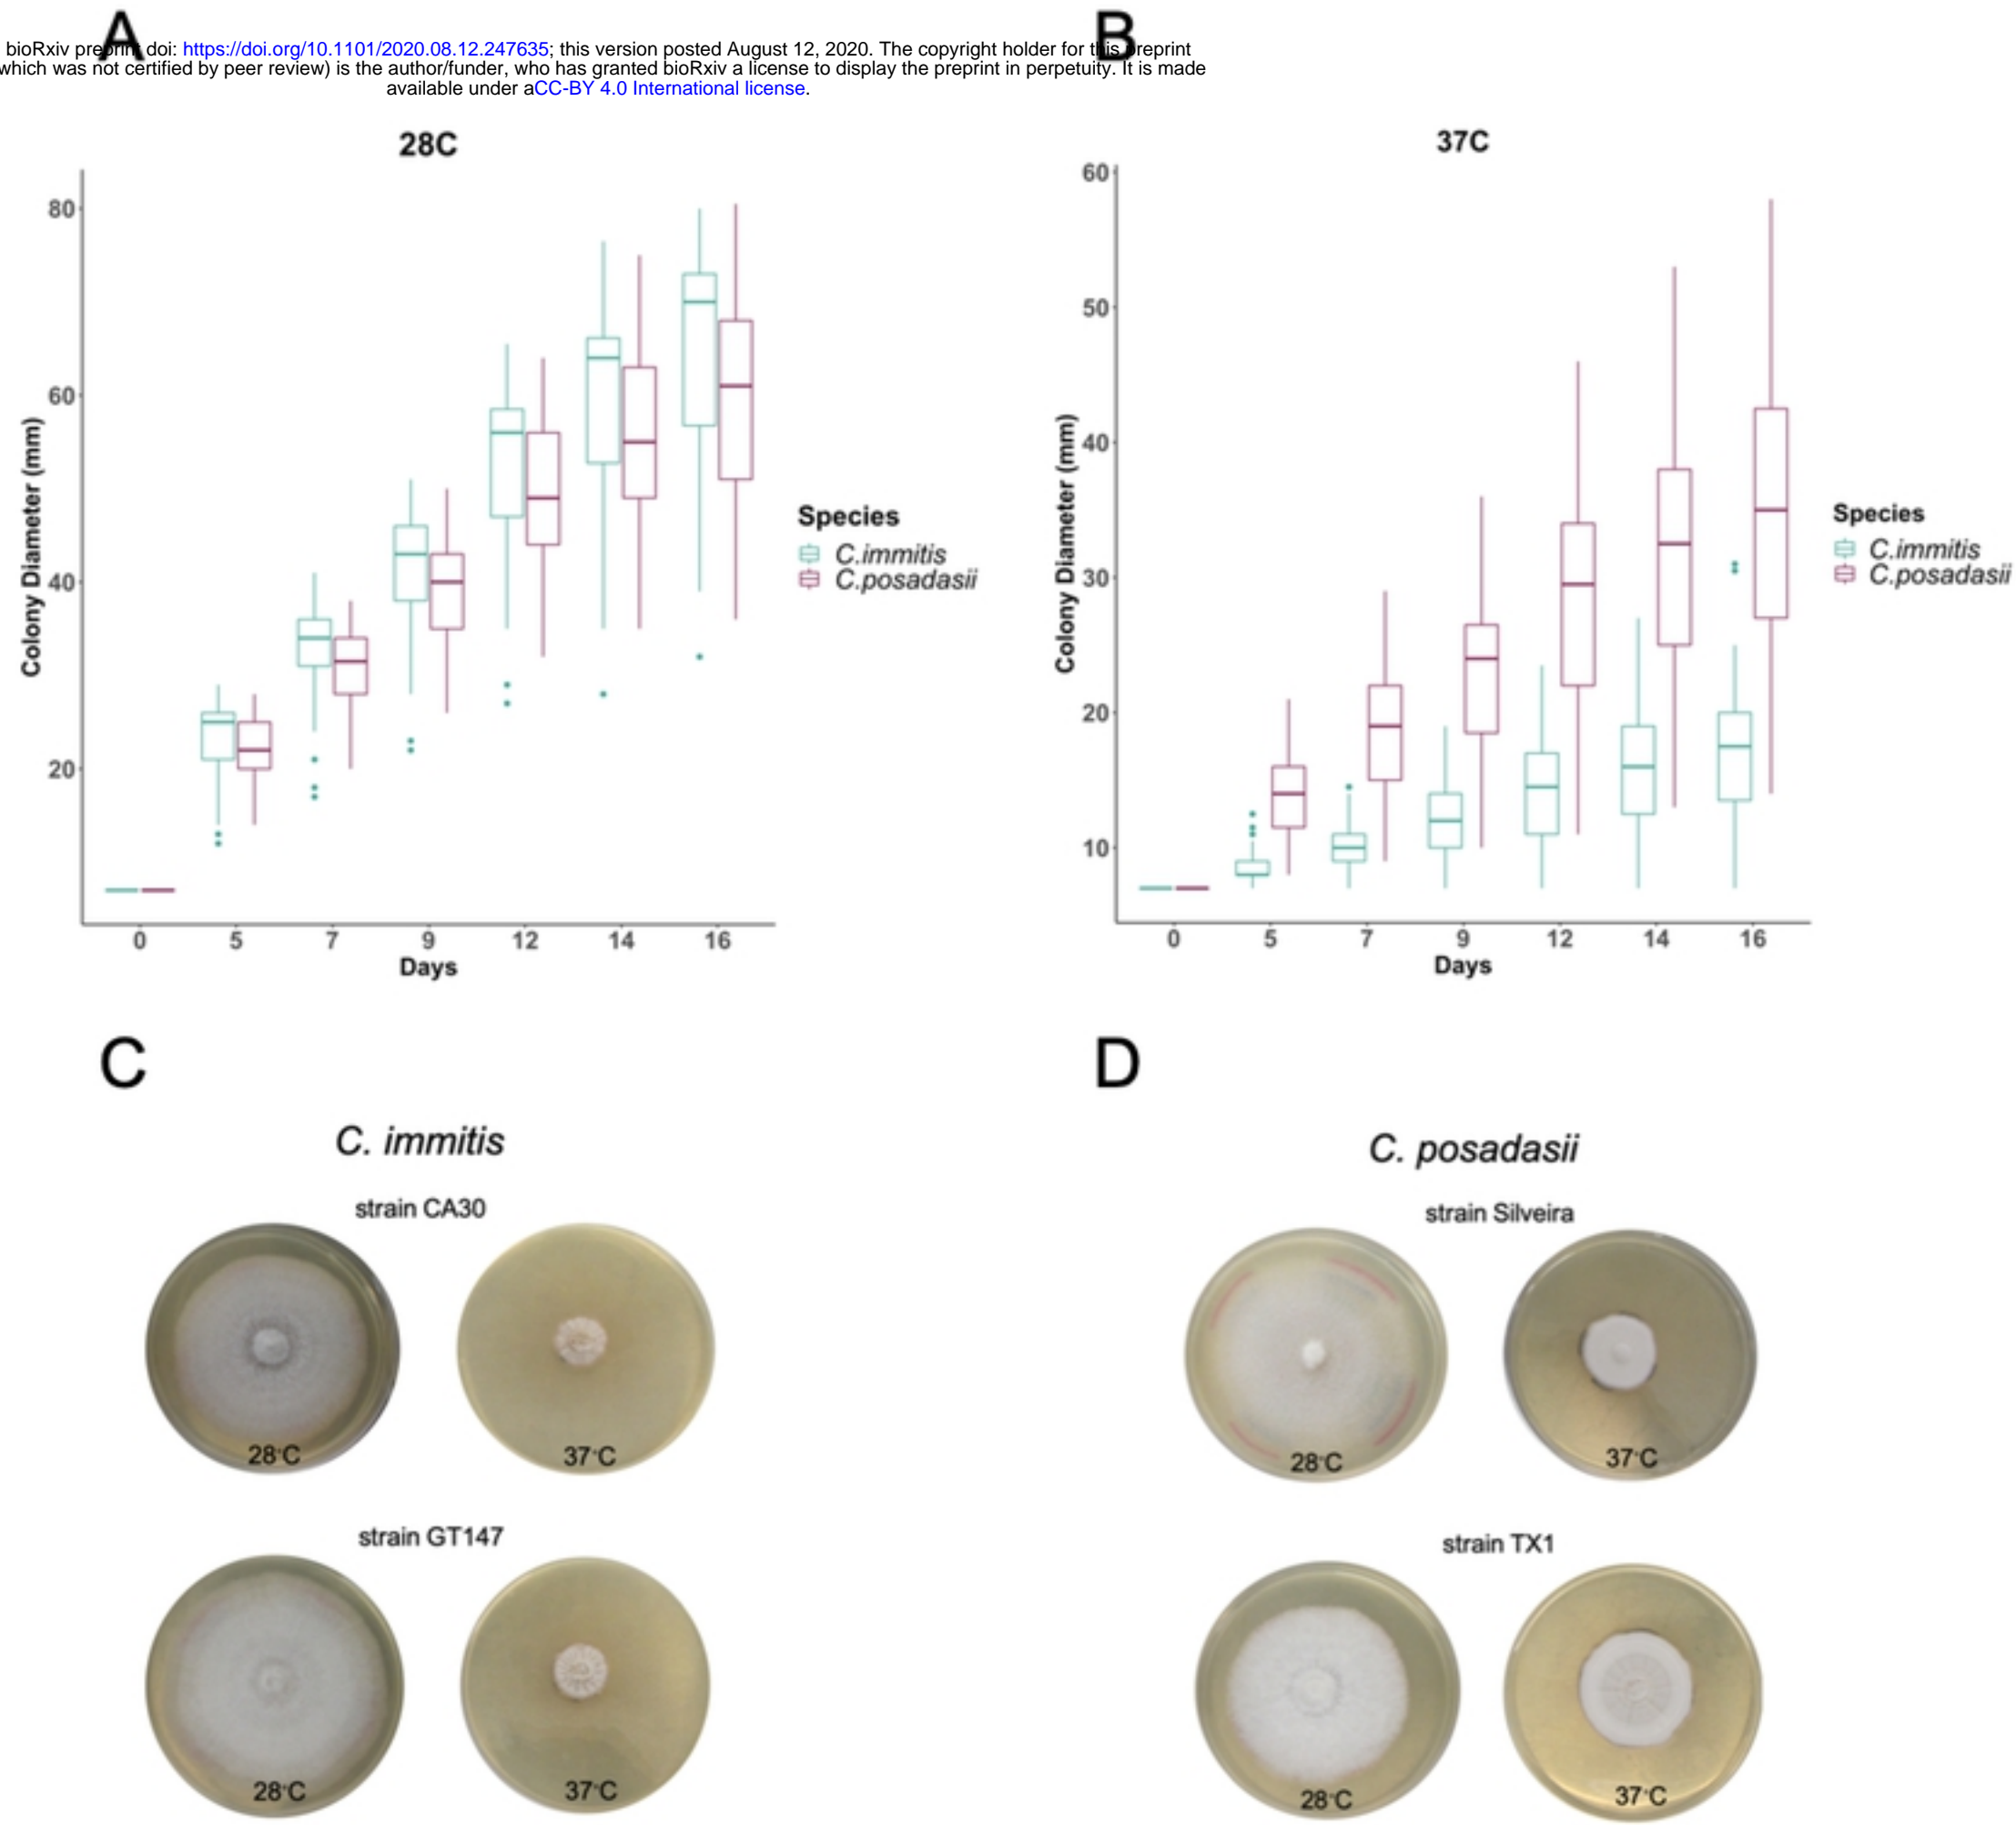

Figure 1

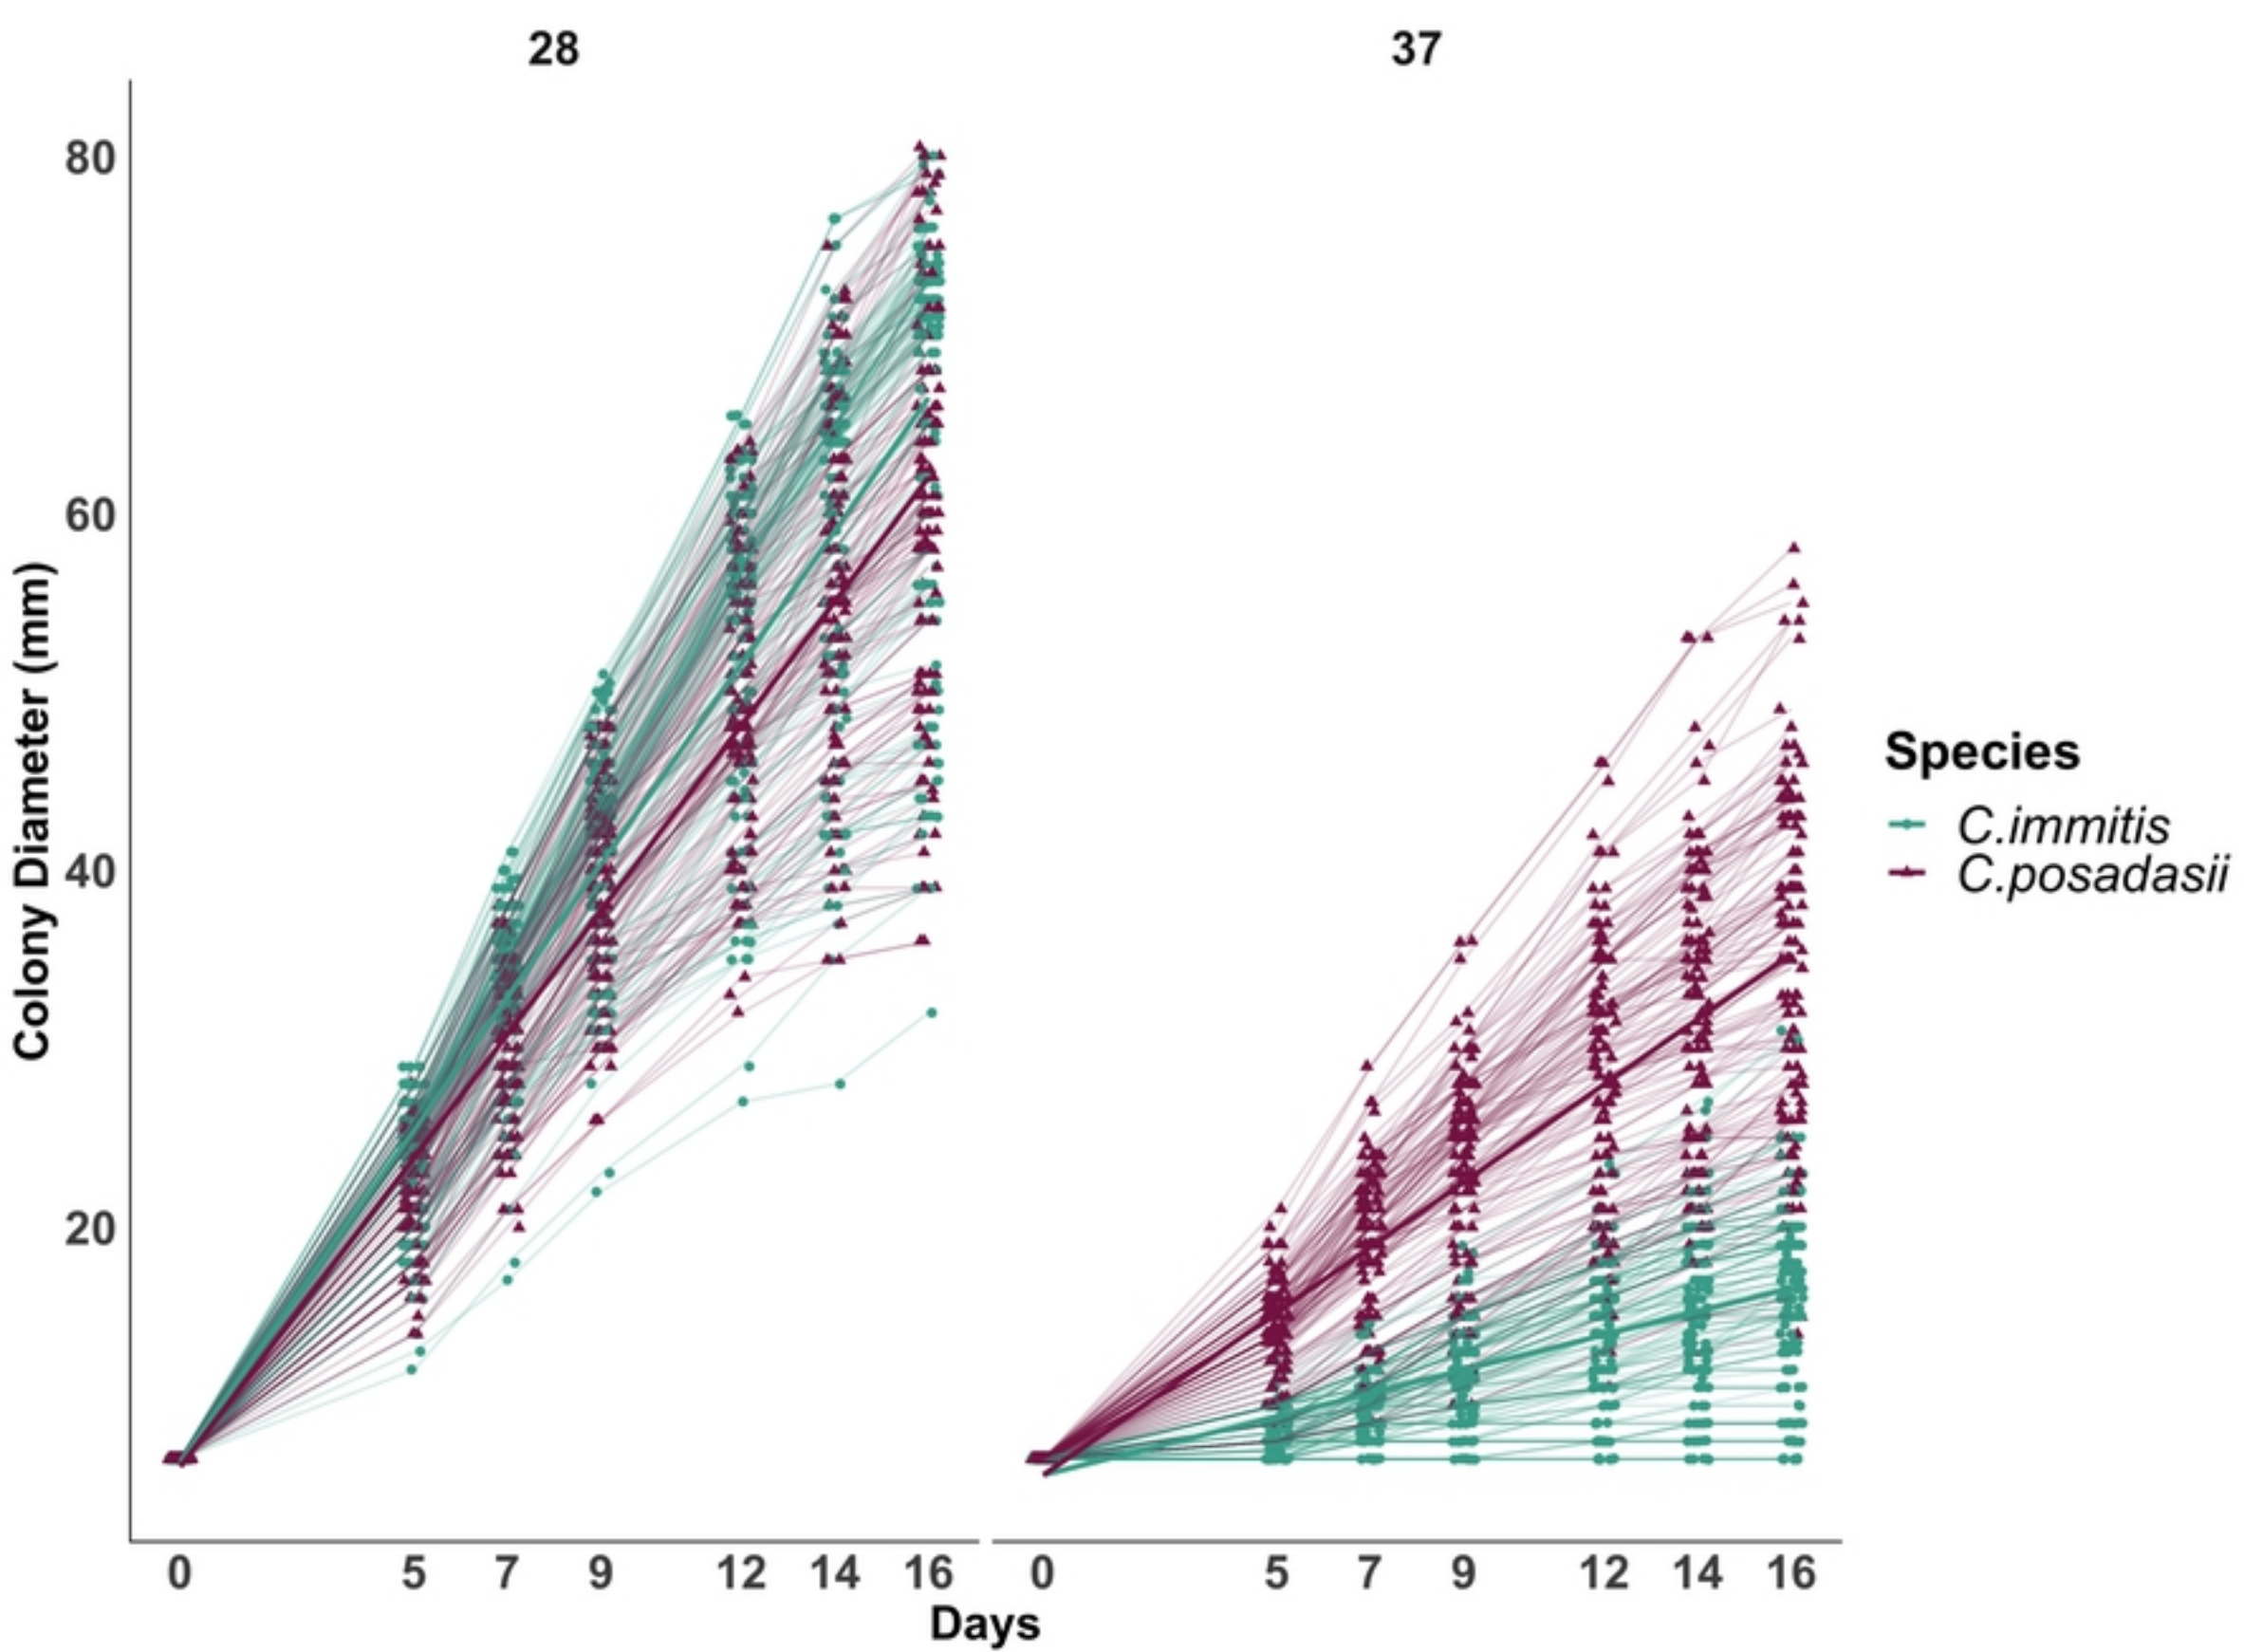

Figure 2
