1 *Research Manuscript*

## 2 **Differential thermotolerance adaptation between** 3 **species of *Coccidioides***

4 **Heather L. Mead<sup>1</sup>, Paris S. Hamm<sup>2</sup>, Isaac N. Shaffer<sup>3</sup>, Marcus de Melo Teixeira<sup>4</sup>, Christopher S.**  
5 **Wendel<sup>5</sup>, Nathan P. Wiederhold<sup>6</sup>, George R. Thompson III<sup>7</sup>, Raquel Muñoz-Salazar<sup>8</sup>, Laura Rosio**  
6 **Castañón-Olivares<sup>9</sup>, Paul Keim<sup>1</sup>, Carmel Plude<sup>10</sup>, Joel Terriquez<sup>10</sup>, John N. Galgiani<sup>11</sup>, Marc J.**  
7 **Orbach<sup>¶11,12</sup>, Bridget M. Barker<sup>¶\*1,11</sup>**

8 1 Pathogen and Microbiome Institute, Northern Arizona University, Flagstaff, AZ 86011. U.S.A.

9 2 Department of Biology, University of New Mexico, Albuquerque, NM 87131. U.S.A.

10 3 School of Informatics, Computers, and Cyber Systems, Northern Arizona University, Flagstaff, AZ 86011.  
11 U.S.A.

12 4 Faculty of Medicine, University of Brasilia, Brasilia, Brazil

13 5 Department of Medicine, University of Arizona, Tucson, AZ 85721. U.S.A.

14 6 Department of Pathology and Laboratory Medicine, University of Texas Health Science Center at San  
15 Antonio, San Antonio, TX 77030. U.S.A.

16 7 Departments of Internal Medicine Division of Infectious Diseases, and Medical Microbiology and  
17 Immunology, University of California-Davis, Sacramento, CA 95616. U.S.A.

18 8 Laboratorio de Epidemiología y Ecología Molecular, Escuela Ciencias de la Salud, Universidad Autónoma  
19 de Baja California, Unidad Valle Dorado, Ensenada, B. C., México

20 9 Department of Microbiology and Parasitology, Universidad Nacional Autónoma de México, Ciudad de  
21 México, México

22 10 Northern Arizona Healthcare, Flagstaff, AZ 86001. U.S.A.

23 11 Valley Fever Center for Excellence, University of Arizona, Tucson, AZ 85721. U.S.A.

24 12 School of Plant Sciences, University of Arizona, Tucson, AZ 85721. U.S.A.

25 \*Corresponding author

26 Email: [bridget.barker@nau.edu](mailto:bridget.barker@nau.edu) (BMB)

27 ¶ These authors contributed equally to the work

28 Received: date; Accepted: date; Published: date

29 Abstract. Coccidioidomycosis, or Valley fever, is caused by two species of dimorphic fungi. Based  
30 on molecular phylogenetic evidence, the genus *Coccidioides* contains two reciprocally monophyletic  
31 species: *C. immitis* and *C. posadasii*. However, phenotypic variation between species has not been  
32 deeply investigated. We therefore explored differences in growth rate under various conditions. A  
33 collection of 39 *C. posadasii* and 46 *C. immitis* isolates, representing the full geographical range of the  
34 two species, were screened for mycelial growth rate at 37°C and 28°C on solid media. The radial  
35 growth rate was measured over 16 days on yeast extract agar. A linear mixed effect model was used  
36 to compare the growth rate of *C. posadasii* and *C. immitis* at 37°C and 28°C respectively. *C. posadasii*  
37 grew significantly faster at 37°C, when compared to *C. immitis*; whereas both species had similar  
38 growth rates at 28°C. These results indicate thermotolerance differs between these two species. As  
39 the ecological niche has not been well-described for *Coccidioides* spp., and disease variability  
40 between species has not been shown, the evolutionary pressure underlying the adaptation is  
41 unclear. However, this research reveals the first significant phenotypic difference between the two  
42 species that directly applies to ecological and clinical research.

43 **Keywords:** coccidioidomycosis, fungal pathogen, phenotypic variation, growth rate, Valley fever

### 44 **1. Introduction**

45 Coccidioidomycosis, or Valley fever, is an environmentally acquired disease caused by  
46 inhalation of arthroconidia of dimorphic fungi belonging to the genus *Coccidioides*. In the  
47 environment, the fungi grow as filamentous mycelia, alternate cells of which autolyze and become  
48 fragile, leaving intact asexual arthroconidia that may disperse via wind or soil disruption. If inhaled

49 by a susceptible host, an arthroconidium switches to a host-associated lifecycle and develops into a  
50 specialized infectious structure called a spherule. Subsequently, the host's immune system either  
51 represses spherule replication or the host succumbs to the illness (1, 2). It is thought that symptomatic  
52 infection occurs in approximately 40% of human patients, who exhibit a broad spectrum of clinical  
53 symptoms, ranging from acute self-limited pneumonia, fibrocavitary chronic pulmonary infection,  
54 or hematogenous spread to extrapulmonary locations (i.e. disseminated infection) (3). By one  
55 estimate, there are 146,000 new symptomatic U.S. coccidioidal infections each year (4) although the  
56 reported cases are substantially lower (5).

57 Coccidioidomycosis is caused by two species, *C. immitis* and *C. posadasii*. Genetic analysis of  
58 multiple molecular markers has defined two monophyletic clades (6). Subsequent population  
59 genetic/genomic studies revealed that *C. immitis* is composed of at least two populations in the  
60 western U.S., and *C. posadasii* is composed of three populations widely dispersed across the American  
61 continents (7-10). Given the high number of autapomorphic mutations between *Coccidioides* species  
62 and among isolates within species, variation in phenotypes is predicted (11). However, minimal work  
63 characterizing phenotypic differences has been undertaken. A previous study demonstrated that *C.*  
64 *immitis* *in vitro* spherules grew in a synchronous pattern where *C. posadasii* isolates did not (12).  
65 Differences in pathogenesis and other disease-associated phenotypic characteristics among strains  
66 have been reported, although only one study had species information (13-18). The publication that  
67 defined the novel species *C. posadasii* also found species-specific variance in growth rate on media  
68 containing 0.136M NaCl, suggesting that *C. immitis* is more salt tolerant than *C. posadasii*, but due to  
69 overlap in the phenotype, and evaluation of only 10 isolates of each species, it was not statistically  
70 meaningful (6). These data supported observations published in the 1950s - 60s, which proposed that  
71 salinity of the soil may be a factor in determining the distribution of *C. immitis* in Californian soil (19-  
72 21). In contrast, a correlation of *C. posadasii* with saline soils was not observed in Arizona, where other  
73 associations were observed (22-26). Importantly, recent modeling analysis predicts the future  
74 expansion of *Coccidioides* species in response to climate dynamics (27). Therefore, a robust  
75 investigation of abiotic tolerances that may either limit or enhance distribution of *Coccidioides* is  
76 needed (1, 28, 29). Such vital information could provide clues regarding the ecological niche,  
77 geographical range limits, or host-specific adaptations of the two species of *Coccidioides*.

78 The division of *Coccidioides* into two species has been challenged by clinicians because of the lack  
79 of apparent difference in disease manifestation caused by the two pathogens, but recent work  
80 suggests that there might be differences in dissemination patterns between the species (1, 2, 30).  
81 Unfortunately, diagnosis and treatment of coccidioidomycosis does not require clinicians to identify  
82 to species. The current diagnostic methods; AccuProbe® (31), CocciDx (32), and CocciENV (33), do  
83 not distinguish between the two species. Molecular-based technologies exist to differentiate the two  
84 species, but these have not been adapted to clinical use (34, 35). However, genotyping the causative  
85 agent would allow correlation of clinical presentations and outcomes associated with species. Severe  
86 disease and death typically occurs in high risk group patients; however, seemingly healthy  
87 individuals can succumb as well, without a known host immunologic or pathogen genotypic  
88 explanation (36). Currently, the range of disease manifestations is suggested to be primarily due to  
89 host factors (37, 38). There are data supporting variation of virulence among individual isolates, but  
90 there is limited research on the subject (1, 13, 16, 17, 39). A reasonable hypothesis would acknowledge  
91 that both host and pathogen genetics play a role in disease outcome and should be further  
92 investigated (40-43). *Coccidioides*, like other primary fungal pathogens has evolved to withstand 37°C,  
93 mammalian body temperature which contributes to establishing host infection (44, 45).

94 This phenomenon, thermotolerance is an intrinsic characteristic of an organism that allows for  
95 tolerance of excessively high temperatures. Heat acclimation can shape natural populations for a  
96 wide range of microorganisms, and is a physiological adaptation to heat stress imposed by the  
97 colonization of new habitats, global climate change and encountering new hosts (46-54). This  
98 "preadaptation" is particularly important to pathogenic fungi that tolerate growth in high  
99 temperatures, which allows colonization of mammalian tissues (55, 56). For example, *Coccidioides* is  
100 adapted to grow at high temperatures in the environment (i.e. North and South American deserts),

101 and is able to colonize a wide range of endothermic hosts throughout the Americas (57-61). *C. immitis*  
102 is endemic to the California Central Valley, whereas *C. posadasii* is widely distributed, but has highest  
103 prevalence in the Sonoran Desert. The annual mean temperature varies between the hotspot areas,  
104 with the California Central Valley having more mild temperatures compared to the Sonoran Desert,  
105 which led us to hypothesize that *C. posadasii* is more thermotolerant than *C. immitis*. Therefore, we  
106 investigated the growth rate of both species at 37°C representing host temperature and 28°C to  
107 support environmental growth conditions, so that we might elucidate species-specific phenotypic  
108 variation. Here we demonstrate thermotolerance dissimilarity of the two species by analyzing growth  
109 rates of 85 isolates at these two temperatures.

## 110 2. Materials and Methods

111 Strains and Media. 39 *C. posadasii* strains and 46 *C. immitis* strains used in this study are primarily  
112 human patient isolates archived by various institutions, as detailed in Table 1 (6, 8, 28, 62). These  
113 strains represent both the full geographic range of the two species, and the proposed geographically  
114 distinct sub-populations (6, 8). Strains were grown on 2xGYE media (2% glucose, 1% yeast extract,  
115 1.5% agar w/v) to supply initial plugs to inoculate plates for growth analysis. Yeast Extract (YE) media  
116 (0.5% yeast extract, 1.5% agar w/v) was used for growth experiments. Flagstaff Medical Center  
117 isolates were collected under IRB No. 764034 through Northern Arizona Healthcare as part of the  
118 Northern Arizona University Biobank.

119 Growth Conditions and Measurements. Colonies were started by spreading approximately 10<sup>6</sup>  
120 arthroconidia over the entire surface of a 2xGYE plate to create a lawn of mycelium to be transferred  
121 to initiate the thermotolerance experiment; this allowed measurement of colonial growth and not  
122 spore germination differences. After five days of growth at 25°C, 7mm diameter mycelial plugs were  
123 subcultured to the center of YE plates using a transfer tool (Transfertube® Disposable Harvesters,  
124 Spectrum® Laboratories). Three replicates of each strain were plated for each experiment. All plates  
125 (100mm x 15mm BD Falcon 1015) were sealed with gas permeable seals (labtape form TimeMed  
126 Labeling Systems, Inc or Key Scientific plate seals) for safety. Plates were placed in temperature-  
127 controlled incubators at either 28°C or 37°C in the dark under ambient humidity (30-50% RH) and  
128 CO<sub>2</sub> (0.1%) conditions. Plate stacks were rotated from top to bottom and repositioned in the incubator  
129 with each measurement timepoint to reduce effects of environmental variation within the incubators.  
130 For measurement of radial growth, the diameter of each colony was measured in mm at 5, 7, 9, 12,  
131 14, and 16 days post-subculture. The initial experiment proceeded at University of Arizona (UA) and  
132 subsequent testing with a new set of isolates occurred at Northern Arizona University (NAU). Details  
133 for strains tested at each institution are listed in Table 1 and all raw measurement data are available  
134 in File S1.

135 Statistical Analysis. To estimate the mean growth rate for each species over the two-week period  
136 a mixed effect linear model for each temperature was constructed using the lme4 package in R version  
137 3.6.2 (63, 64). Initially, data sets were divided by institution and after concluding that species specific  
138 growth rate was not impacted by collection site the data sets were combined (Table S1). In the  
139 temperature specific models, the factors “day” and “species” were assumed to be fixed linear effects,  
140 and individual isolate response for each day was considered to be a normally distributed random  
141 effect as appropriate in a longitudinal study. Thus, the response variable of colony diameter was  
142 modeled with fixed effects and a random effect to determine if growth rates varied between strains  
143 at either 28°C and 37°C. Shapiro-Wilk test (p-value < 0.001) shows that residuals are not normally  
144 distributed. However, the large sample size and overall residual structure support that a linear model  
145 is the most appropriate for this data set. In addition, bootstrapping using the boot package in R (65,  
146 66) was used to estimate 95% confidence intervals (CIs) for growth rates and other fixed effects  
147 (nsim=2,000). All bootstrap parameters were similar and support model estimates. A comparison  
148 between bootstrapped CIs and CIs constructed using the linear model can be found in S1 Table and  
149 S2 Table.

## 150 3. Results

151 To define variability of one phenotypic trait between two *Coccidioides* species, we examined the  
 152 ability of *Coccidioides* spp. to grow in filamentous form at 37°C and 28°C on yeast extract (YE) agar. In  
 153 this study, we surveyed 85 strains of *Coccidioides*, representing isolates from the entire geographical  
 154 range of *Coccidioides*, for growth rate differences between species at 37°C and 28°C (Figure 1). Initial  
 155 investigations occurred at the University of Arizona, and subsequent studies occurred at Northern  
 156 Arizona University (Table 1).

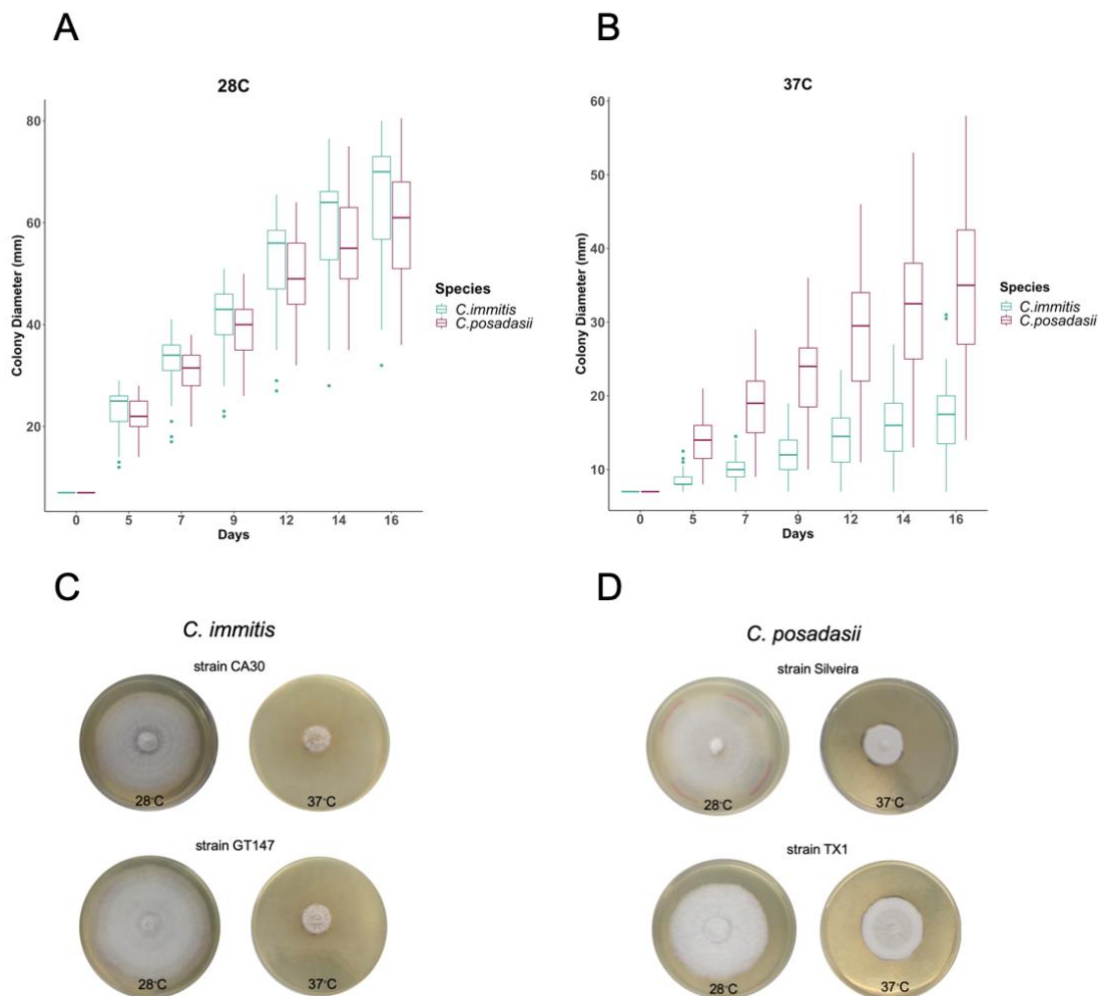

157

158

Table 1. Strain information

| ID          | Species             | Geographical Origin <sup>a</sup> | Source                                            | Testing Institution |
|-------------|---------------------|----------------------------------|---------------------------------------------------|---------------------|
| CA22        | <i>C. immitis</i>   | California                       | University of Texas Health Science Center (UTHSC) | NAU                 |
| 500         | <i>C. posadasii</i> | Soil, Tucson, AZ                 | University of Arizona (UA)                        | UA                  |
| IL1         | <i>C. posadasii</i> | Illinois                         | UTHSC                                             | NAU                 |
| CA23        | <i>C. immitis</i>   | California                       | UTHSC                                             | NAU                 |
| HS-I-000718 | <i>C. posadasii</i> | Arizona                          | Flagstaff Medical Center (FMC)                    | NAU                 |
| GT164       | <i>C. posadasii</i> | Texas                            | University of California Davis (UCD)              | NAU                 |
| GT163       | <i>C. immitis</i>   | California                       | UCD                                               | NAU                 |
| HS-I-000588 | <i>C. posadasii</i> | Arizona                          | FMC                                               | NAU                 |
| CA28        | <i>C. immitis</i>   | California                       | UTHSC                                             | NAU                 |
| TX4         | <i>C. posadasii</i> | Texas                            | UTHSC                                             | NAU                 |

|             |                     |                          |                                                                |     |
|-------------|---------------------|--------------------------|----------------------------------------------------------------|-----|
| HS-I-000235 | <i>C. posadasii</i> | Arizona                  | FMC                                                            | NAU |
| TX1         | <i>C. posadasii</i> | Texas                    | UTHSC                                                          | NAU |
| HS-I-000778 | <i>C. posadasii</i> | Arizona                  | FMC                                                            | NAU |
| GT147       | <i>C. immitis</i>   | California               | UCD                                                            | NAU |
| HS-I-000234 | <i>C. posadasii</i> | Texas                    | FMC                                                            | NAU |
| CA30        | <i>C. immitis</i>   | California               | UTHSC                                                          | NAU |
| HS-I-000547 | <i>C. posadasii</i> | Arizona                  | FMC                                                            | NAU |
| HS-I-000233 | <i>C. posadasii</i> | Arizona                  | FMC                                                            | NAU |
| GT166       | <i>C. posadasii</i> | Texas                    | UCD                                                            | NAU |
| CA24        | <i>C. immitis</i>   | California               | UTHSC                                                          | NAU |
| CA29        | <i>C. immitis</i>   | California               | UTHSC                                                          | NAU |
| M211        | <i>C. posadasii</i> | Central Mexico           | Unidad de Micología,<br>UNAM                                   | NAU |
| GT158       | <i>C. posadasii</i> | Arizona                  | UCD                                                            | NAU |
| CA15        | <i>C. immitis</i>   | California               | UTHSC                                                          | NAU |
| CA27        | <i>C. immitis</i>   | California               | UTHSC                                                          | NAU |
| TX3         | <i>C. posadasii</i> | Texas                    | UTHSC                                                          | NAU |
| CA20        | <i>C. immitis</i>   | California               | UTHSC                                                          | NAU |
| RS          | <i>C. immitis</i>   | California               | Common Laboratory Strain                                       | NAU |
| Silveira    | <i>C. posadasii</i> | California               | Common Laboratory Strain                                       | NAU |
| RMSCC2378   | <i>C. posadasii</i> | Argentina                | R. Negroni                                                     | UA  |
| RMSCC2377   | <i>C. posadasii</i> | Argentina                | R. Negroni                                                     | UA  |
| RMSCC2379   | <i>C. posadasii</i> | Argentina                | R. Negroni                                                     | UA  |
| RMSCC3698   | <i>C. immitis</i>   | Barstow, California      | Naval Hospital                                                 | UA  |
| RMSCC3490   | <i>C. posadasii</i> | Coahuila, Mexico         | I. Gutierrez                                                   | UA  |
| RMSCC3505   | <i>C. immitis</i>   | Coahuila, Mexico         | I. Gutierrez                                                   | UA  |
| RMSCC3506   | <i>C. posadasii</i> | Coahuila, Mexico         | I. Gutierrez                                                   | UA  |
| RMSCC3472   | <i>C. posadasii</i> | Michoacán, Mexico        | I. Gutierrez                                                   | UA  |
| RMSCC3474   | <i>C. immitis</i>   | Michoacán, Mexico        | I. Gutierrez                                                   | UA  |
| RMSCC3475   | <i>C. immitis</i>   | Michoacán, Mexico        | I. Gutierrez                                                   | UA  |
| RMSCC3476   | <i>C. immitis</i>   | Michoacán, Mexico        | I. Gutierrez                                                   | UA  |
| RMSCC3478   | <i>C. posadasii</i> | Michoacán, Mexico        | I. Gutierrez                                                   | UA  |
| RMSCC3479   | <i>C. immitis</i>   | Michoacán, Mexico        | I. Gutierrez                                                   | UA  |
| RMSCC3377   | <i>C. immitis</i>   | Monterey,<br>California  | UCD                                                            | UA  |
| RMSCC2343   | <i>C. posadasii</i> | Nuevo Leon,<br>Mexico    | R. Diaz                                                        | UA  |
| RMSCC2346   | <i>C. posadasii</i> | Nuevo Leon,<br>Mexico    | R. Diaz                                                        | UA  |
| RMSCC3738   | <i>C. posadasii</i> | Piaui, Brazil            | B. Wanke                                                       | UA  |
| RMSCC3740   | <i>C. posadasii</i> | Piaui, Brazil            | B. Wanke                                                       | UA  |
| RMSCC2127   | <i>C. posadasii</i> | Texas                    | UTHSC                                                          | UA  |
| RMSCC2133   | <i>C. posadasii</i> | Texas                    | UTHSC                                                          | UA  |
| RMSCC2234   | <i>C. posadasii</i> | Texas                    | UTHSC                                                          | UA  |
| RMSCC2102   | <i>C. immitis</i>   | San Diego,<br>California | University of California San<br>Diego (UCSD) Medical<br>Center | UA  |
| RMSCC2394   | <i>C. immitis</i>   | San Diego,<br>California | UCSD Medical Center                                            | UA  |
| RMSCC2395   | <i>C. immitis</i>   | San Diego,<br>California | UCSD Medical Center                                            | UA  |

|           |                     |                       |                                  |            |
|-----------|---------------------|-----------------------|----------------------------------|------------|
| RMSCC3693 | <i>C. immitis</i>   | San Diego, California | Naval Hospital                   | UA         |
| RMSCC3703 | <i>C. immitis</i>   | San Diego, California | UCSD Medical Center              | UA         |
| RMSCC3705 | <i>C. immitis</i>   | San Diego, California | UCSD Medical Center              | UA         |
| RMSCC3706 | <i>C. immitis</i>   | San Diego, California | UCSD Medical Center              | UA         |
| RMSCC2006 | <i>C. immitis</i>   | San Joaquin Valley    | Kern County Public Health (KCPH) | UA         |
| RMSCC2009 | <i>C. immitis</i>   | San Joaquin Valley    | KCPH                             | UA         |
| RMSCC2010 | <i>C. immitis</i>   | San Joaquin Valley    | KCPH                             | UA and NAU |
| RMSCC2011 | <i>C. immitis</i>   | San Joaquin Valley    | KCPH                             | UA         |
| RMSCC2012 | <i>C. immitis</i>   | San Joaquin Valley    | KCPH                             | UA         |
| RMSCC2014 | <i>C. immitis</i>   | San Joaquin Valley    | KCPH                             | UA         |
| RMSCC2015 | <i>C. immitis</i>   | San Joaquin Valley    | KCPH                             | UA         |
| RMSCC2017 | <i>C. immitis</i>   | San Joaquin Valley    | KCPH                             | UA         |
| RMSCC2268 | <i>C. immitis</i>   | San Joaquin Valley    | KCPH                             | UA         |
| RMSCC2269 | <i>C. immitis</i>   | San Joaquin Valley    | KCPH                             | UA         |
| RMSCC2271 | <i>C. immitis</i>   | San Joaquin Valley    | KCPH                             | UA         |
| RMSCC2273 | <i>C. immitis</i>   | San Joaquin Valley    | KCPH                             | UA         |
| RMSCC2274 | <i>C. immitis</i>   | San Joaquin Valley    | KCPH                             | UA         |
| RMSCC2275 | <i>C. immitis</i>   | San Joaquin Valley    | KCPH                             | UA         |
| RMSCC2276 | <i>C. immitis</i>   | San Joaquin Valley    | KCPH                             | UA         |
| RMSCC2277 | <i>C. immitis</i>   | San Joaquin Valley    | KCPH                             | UA         |
| RMSCC2278 | <i>C. immitis</i>   | San Joaquin Valley    | KCPH                             | UA         |
| RMSCC2279 | <i>C. immitis</i>   | San Joaquin Valley    | KCPH                             | UA         |
| RMSCC2280 | <i>C. immitis</i>   | San Joaquin Valley    | KCPH                             | UA         |
| RMSCC2281 | <i>C. immitis</i>   | San Joaquin Valley    | KCPH                             | UA         |
| RMSCC3480 | <i>C. posadasii</i> | Sonora, Mexico        | I. Gutierrez                     | UA         |
| RMSCC3487 | <i>C. posadasii</i> | Sonora, Mexico        | I. Gutierrez                     | UA         |
| RMSCC3488 | <i>C. posadasii</i> | Sonora, Mexico        | I. Gutierrez                     | UA         |
| RMSCC1040 | <i>C. posadasii</i> | Tucson, Arizona       | UA                               | UA         |
| RMSCC1043 | <i>C. posadasii</i> | Tucson, Arizona       | UA                               | UA         |
| RMSCC1044 | <i>C. posadasii</i> | Tucson, Arizona       | UA                               | UA         |
| RMSCC1045 | <i>C. posadasii</i> | Tucson, Arizona       | UA                               | UA         |
| RMSCC3796 | <i>C. posadasii</i> | Venezuela             | G. San-Blas                      |            |

159 <sup>a</sup>Often patient diagnosis location

160 We observed that mean growth rates varied slightly between institutions however overall  
 161 species-specific temperature behavior remained. Therefore, data sets were combined (Figure S1,  
 162 Table S1). Using a mixed effect linear model, we showed a significant species-specific difference for  
 163 growth of the mycelial phase of the fungus based on temperature (Figure 2 and Table 2). Table 2  
 164 summarizes the estimated growth rate for each species, 95% confidence interval (CI), and p-value for  
 165 each temperature specific model. Both species grew quicker at 28°C than 37°C. Although, *C. posadasii*  
 166 had a larger mean diameter on all days tested (Table S3) the overall rate of increase was not  
 167 statistically significant (p-value = 0.072, Table 2). This was in contrast to growth at 37°C. At this  
 168 temperature, *C. posadasii* strains exhibited larger mean diameters, which reached double the diameter  
 169 of *C. immitis* by day 16 (Table S3). At this temperature the overall growth rate of *C. posadasii* was  
 170 1mm/day faster than *C. immitis* (Figure 2 and Table 2). This difference was statistically significant (p-  
 171 value < 0.001, Table 2). These findings were consistent for all days tested, and represent differential  
 172 phenotypes for both species. Thus, our analysis indicates that high temperature is the important

173 variable between species growth rate on solid media. This phenotypic difference supports the  
 174 molecular phylogenetic species designation and may reflect adaptation of *C. immitis* to cooler  
 175 environments, or possibly specific hosts.

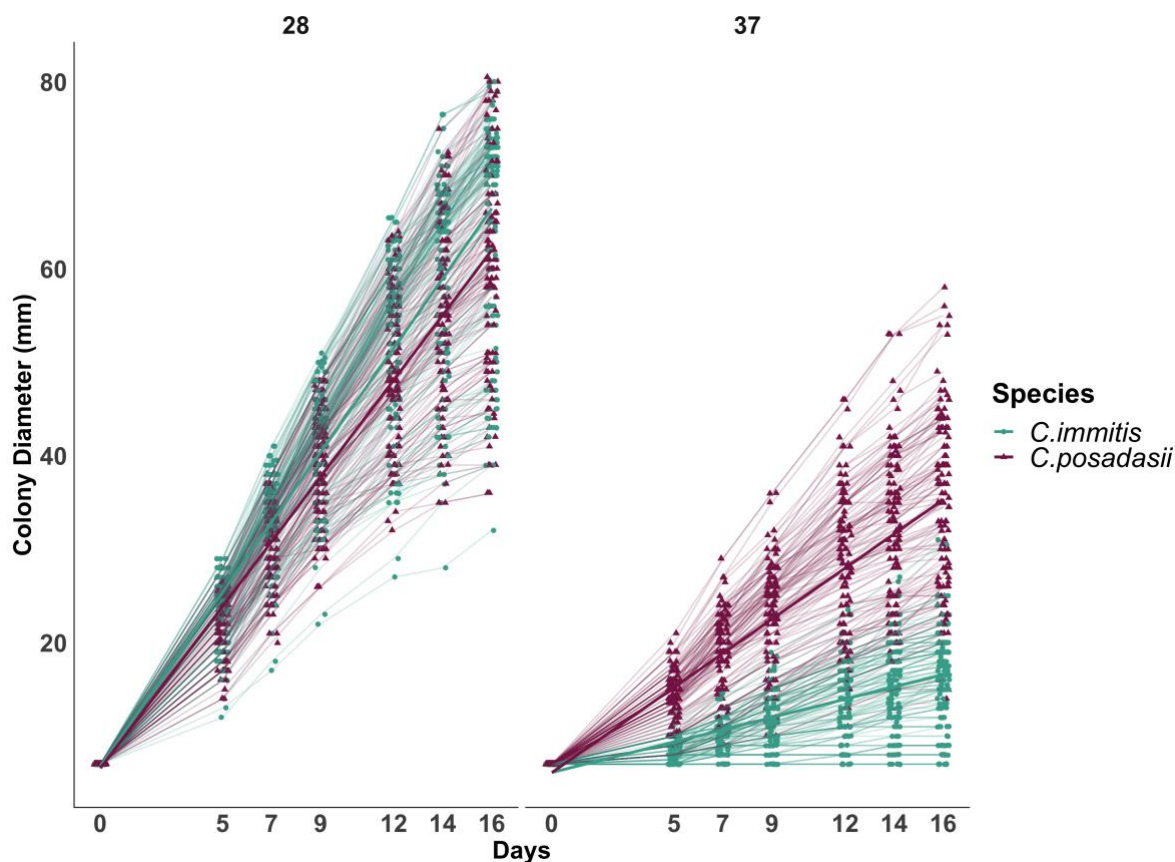

176

177 Table 2. Temperature Specific Linear Model Slope Estimates for Radial Growth Rate at 28°C or 37°C.

| Species                   | Colony Diameter at 28°C |             |       | Colony Diameter at 37°C |             |        |
|---------------------------|-------------------------|-------------|-------|-------------------------|-------------|--------|
|                           | mm/day                  | 95% CI      | $p^a$ | mm/day                  | 95% CI      | $p^a$  |
| <i>C. immitis</i> x Day   | 3.73                    | 3.53 – 3.92 | 0.072 | 0.64                    | 0.51 – 0.78 | <0.001 |
| <i>C. posadasii</i> x Day | 3.47                    | 0.55 – 0.02 |       | 1.82                    | 0.98 – 1.38 |        |
| N <sup>b</sup>            | 85                      |             |       | 85                      |             |        |

<sup>a</sup> difference between estimated slope <sup>b</sup> number of isolates

178 Summary of temperature specific linear models, for 28°C and 37°C, respectively. Colony growth estimates for  
 179 each species per day (slope), 95% confidence intervals (CI) and p values. At 28°C, *C. immitis* grows 3.73 mm/day  
 180 which is 0.26 mm faster per day than *C. posadasii*. The difference in slope is not significant ( $p=0.072$ ) based on  $\alpha=$   
 181 0.05. However, the p-value trends towards significance. At 37°C, *C. immitis* grows 0.64mm/day which is 1.18mm  
 182 slower than *C. posadasii*. The difference in slope (CI, 0.98-1.38 mm/day) is statistically significant ( $p<0.001$ ).

### 183 3.1 Figures, Tables and Schemes

184 Fig 1. Temperature impacts growth ability of *C. immitis* isolates compared to *C. posadasii* on YE  
 185 media. Seven mm diameter plugs were sub-cultured onto yeast extract plates and radial growth was  
 186 documented over 16 days. (A) Radial growth measurements at 37°C for 46 *C. posadasii* and 39 *C.*  
 187 *immitis* isolates in triplicate. (B) Radial growth measurements at 28°C for 46 *C. posadasii* and 39 *C.*

188 *immitis* isolates in triplicate. (C) Representative samples of phenotypic variation observed between  
189 species on day 16.

190 Fig 2. Radial growth rate of 85 isolates of *Coccidioides* demonstrates species-specific response to  
191 temperature. Each line represents the mean diameter (y-axis) for each isolate in triplicate (46 *C.*  
192 *immitis* and 39 *C. posadasii*) at a given time point (x-axis). Dark lines represent mean growth rate of  
193 each species. Radial growth was measured at day 5, 7, 9, 12, 14 and 16. There is a significant difference  
194 in growth rate (slope) in response to higher temperature between species of *Coccidioides*. The radial  
195 growth rate of *C. immitis* is decreased at a higher temperature 37°C (slope<sub>37</sub> = 0.64 mm/day; 95% C.I.  
196 0.51-0.78) compared to *C. posadasii* (slope<sub>37</sub> = 1.82 mm/day; 95% C.I. 1.49-2.16). Both species appear  
197 to tolerate 28°C and grow at a similar rate (*C. immitis* slope<sub>28</sub> = 3.73 mm/day; 95% C.I. 3.53-3.92, *C.*  
198 *posadasii*, slope<sub>28</sub> = 3.47 mm/day; 95% C.I. 2.98-3.90).

#### 199 4. Discussion

200 Although many studies have looked at genetic variation among isolates of both species of  
201 *Coccidioides*, few studies have compared phenotypic differences. Observed genetic diversity between  
202 and within species makes it reasonable to hypothesize that phenotypic variation exists. We propose  
203 that a methodical documentation of phenotypic variation is a necessary first step to determine the  
204 ecological or clinical relevance of these traits. In this study, we have identified a definitive phenotypic  
205 difference with a congruent analysis at two institutions for a diverse set of isolates. A total of 85  
206 isolates covering the geographic range of both species show that *C. posadasii* isolates grow at a  
207 significantly faster rate ( $p < 0.001$ , Fig 2 and Table 2) than *C. immitis* isolates in the mycelial form at  
208 37°C on YE agar. Additionally, *C. immitis* grows slightly faster than *C. posadasii* at 28°C on YE agar  
209 although the difference in growth rate is not significant ( $p$ -value = 0.072, Fig 2 and Table 2). We note  
210 that growth rate may be influenced by nutrition source, and the results are limited to the media  
211 utilized for the current study.

212 Functionally, this phenotype is similar to a classic temperature sensitive (ts) conditional mutant,  
213 such that *C. immitis* exhibits normal growth at permissive temperature, and significantly slower  
214 growth under stressful conditions. It is possible that *C. immitis* could be restored to normal growth at  
215 37°C by gene replacement with appropriate *C. posadasii* alleles if candidate genes were identified.  
216 Several genes and pathways have been described in *Aspergillus fumigatus* related to thermotolerance  
217 (54). For example, the observed phenotype could be due to mutations in a heat shock protein (Hsp).  
218 Hsps are activated in response to changes in temperature and regulate cellular processes associated  
219 with morphogenesis, antifungal resistance, and virulence by triggering a wide array of cellular  
220 signaling pathways (53, 67). Hsps are activated by a heat shock transcription factor (Hsf) that acts as  
221 a thermosensor, regulating the Hsps at specific growth temperatures (68). Several studies have shown  
222 that *Coccidioides* up-regulates heat shock proteins Hsp20 and Hsp9/12 at high temperature during the  
223 parasitic lifecycle while down-regulating Hsp30 and Hsp90 (69-72). Further investigation of Hsps  
224 and Hsfs in *Coccidioides* could elucidate mechanisms of the species-specific thermotolerant behavior  
225 observed in this study. Alternatively, many classical ts mutants occur in genes required for normal  
226 cellular growth and are due to single amino acid changes that affect protein function or stability at  
227 the restrictive temperature. For example, a number of colonial temperature sensitive (*cot*) mutants  
228 have been identified in *Neurospora crassa*. The *N. crassa cot-1* mutant has been studied in greatest  
229 detail, and the ts defect is due to a SNP causing a single amino acid change in a Ser/Thr protein kinase  
230 required for normal hyphal extension, thus resulting in restricted growth at normally permissive  
231 temperatures above 32°C (73, 74). Finally, recent work in *Saccharomyces* indicates that mitochondrial  
232 genotypes are associated with heat tolerance (75). The mitochondrial genomes of the two species of  
233 *Coccidioides* are also distinct, and thus mitochondrial function is another potential mechanism  
234 controlling thermotolerance in *Coccidioides*.

235 The source of the genotypic variation driving the observed phenotype may be attributable to a  
236 stochastic event, such as a founder effect or population bottleneck 10-12 MYA, which is the estimated  
237 time the two species have been separated (6, 76). Alternatively, the observed pattern may be due to  
238 selection pressure from a specific environment, host, or directly associated with virulence. Thus, the



239 observed differential thermotolerance may relate to the saprobic phase of the lifecycle and reflect  
240 adaptation to specific environments. A pattern of alternating wet-dry conditions has been related to  
241 Valley fever incidence across the southwestern U.S. (5, 77-81). It has been proposed that fungal  
242 growth occurs during brief periods of heavy moisture during monsoon and winter rainy seasons in  
243 the Southwest, which are followed by prolific conidia production when warm temperatures and low  
244 rainfall desiccate soils and increase dispersal via dust (the “grow and blow” hypothesis) (27, 78, 82).  
245 Additionally, during high temperature periods, it is hypothesized that the surface soil is partially  
246 sterilized and many competitors are removed, but *Coccidioides* spores remain viable (26). Another  
247 hypothesis is that *C. posadasii* may be better adapted to growth in the high soil temperatures observed  
248 in the southwestern deserts compared to the California endemic *C. immitis*. Maricopa, Pinal and Pima  
249 counties harbor the highest coccidioidomycosis case rates in Arizona due to *C. posadasii*, and  
250 according to the National Centers for Environmental Information (83), the annual mean temperature  
251 (1901-2000) were 20.7°C, 19.8°C and 19.2°C, respectively. On the other hand, Fresno, King and Kern  
252 counties, which harbor the highest coccidioidomycosis case rates in California due to *C. immitis*, had  
253 annual mean temperatures of 12.4°C, 16.9°C and 15.8°C, respectively. The difference in 100-year  
254 average annual mean temperature between highly endemic areas of Arizona and California supports  
255 our hypothesis that *C. posadasii* is more adapted to higher temperatures compared to *C. immitis*.  
256 Alternatively, a preferred host species may vary in normal body temperature, in accordance with the  
257 endozoan small mammal reservoir hypothesis proposed by Barker and Taylor (84). Interestingly, a  
258 decline in mean human body temperature (~1.6%) has recently been reported (85). Whether this  
259 impacts coccidioidomycosis rates is unknown.

260 Published literature to date suggests that disease outcomes are related primarily to host-specific  
261 factors (37, 38, 86), and certainly, host genetic background can impact disease progression. We  
262 propose that pathogen-specific variation may also contribute to capricious disease outcomes in  
263 coccidioidomycosis patients. Currently, species-specific virulence is not well-documented in  
264 *Coccidioides* research, but has been suggested (1, 87). This is in part due to the use of a few  
265 characterized laboratory strains of *Coccidioides* for most hypothesis testing, primarily strains Silveira,  
266 C735 and RS (70, 86, 88-91). Therefore, connecting phenotypic dissimilarity to established genetic  
267 variation using genome-wide association studies could provide insight into unique characteristics of  
268 these genetically distinct pathogens.

## 269 5. Conclusions

270 In summary, we have identified a significant phenotypic difference between *C. immitis* and *C.*  
271 *posadasii*. Although growth rate on YE media at two temperatures is the only characteristic we  
272 explicitly tested, there are certain to be more phenotypic differences between species, and possibly  
273 between populations. This, coupled with the recent availability of the genome sequence of multiple  
274 strains for both fungal species, may allow comparative genomic approaches to elucidate candidate  
275 genes for thermotolerance regulation in *Coccidioides* and closely related Onygenales (7).

## 276 Supplementary Materials:

277 Fig S1. Growth of *C. immitis* and *C. posadasii* on YE media at NAU and UA. Seven mm diameter plugs were sub-  
278 cultured onto yeast extract plates and radial growth was documented over sixteen days. (A) Radial growth  
279 measurements at 28°C and 37°C for 85 isolates in triplicate, at both institutions. (B) Representative samples of  
280 phenotypic variation observed between species on day sixteen for both NAU and UA experiments.

281 Table S1. Analysis of variance. Impact of institution collection site was investigated for each temperature specific  
282 model. The factors “day”, “species”, and “lab” were assumed to be fixed linear effects, and individual isolate  
283 response for each day was considered to be a normally distributed random effect as appropriate in a longitudinal  
284 study. The Factor “Lab” location adds variation to the data sets but does not alter overall findings. Species  
285 specific behavior based on temperature pattern remain.

286

287 Table S2. Mean Colony Diameter at 28°C. Mean diameter and standard deviation for *C. posadasii* and *C. immitis*  
288 at 28°C. Welch's t-test was used to compare difference in means. Mean is significantly different on all days tested.  
289 Significance is reduced on day 16.

290 Table S3. Mean Colony Diameter at 37°C. Mean diameter and standard deviation for *C. posadasii* and *C. immitis*  
291 at 37°C. Welch's t-test was used to compare difference in means at each time point. Mean is significantly different  
292 on all days tested.

293 Table S4 Table. Comparison Linear Model and Bootstrap Values. Comparison of linear model and bootstrap 95%  
294 confidence intervals for 28°C and 37°C data sets. Bootstrapping conducted using the boot package in R.

295 S1 File. Final Raw Data for Temperature Differences at 37 °C and 28 °C. Measurements (diameter in mm) for  
296 each isolate on each plate were recorded on days 5, 7, 9, 12, 14, and 16. Three replicates were completed for each  
297 strain for both temperature conditions. Strain details are listed in Table 1.

#### 298 **Author Contributions:**

299 H.L.M., P.L.H., M.M.T., C.S.W., M.J.O. and B.M.B. prepared the initial draft of the manuscript. B.M.B., M.J.O.,  
300 and J.N.G. developed the concept, provided funding, and were responsible for approving the final draft of the  
301 manuscript. M.M.T., H.L.M., P.L.H. assisted with creation of figures and writing final manuscript. I.N.S, H.L.M.,  
302 and C.S.W. developed statistical models. H.L.M., P.L.H., B.M.B., performed experiments and collected data.  
303 N.P.W, G.R.T. III, R.M-S, L.R.C-O, P.K., C.P., J.T., J.N.G., provided isolates. All authors have read and agreed  
304 to the published version of the manuscript.

#### 305 **Funding:**

306 This work was funded through an ADCRC grant (Project #6017) NIH grant 1 PO 1AI061310-01, and the US  
307 Department of Veterans Affairs. BMB was supported by NSF IGERT fellowship in Genomics NSF-DGE 0114420  
308 at the University of Arizona, and current support by Arizona Department of Health Services ABRC New  
309 Investigator grant 16-162415. This work was funded in part by a University of New Mexico (UNM) Graduate  
310 and Professional Student Association High Priority Grant to PSH and to HLM through the Grants in  
311 Community, Culture, and Environment by The Center for Ecosystem Science and Society and the McAllister  
312 Program in Community, Culture, and Environment at Northern Arizona University. Flagstaff Medical Center  
313 isolates were collected under IBR No. 764034 through Northern Arizona Healthcare as part of the Northern  
314 Arizona University Biobank. Funding for this biobank was provided by the Flinn Foundation of Arizona seed  
315 grant #1978 to P. Keim and J. Terriquez.

316 Acknowledgments: We are indebted to G. Koenig at Roche Molecular Systems for her assistance with obtaining  
317 several strains for phenotypic analysis. Special appreciation goes to E. Kellner, H. Paes and E. Temporini for  
318 their helpful suggestions.

#### 319 **Conflicts of Interest:**

320 The authors declare no conflict of interest.

321

#### 322 **References**

- 323 1. Cox RA, Magee DM. Coccidioidomycosis: host response and vaccine development. Clin Microbiol Rev.  
324 2004 Oct;17(4):804-39, table of contents.
- 325 2. Lewis ER, Bowers JR, Barker BM. Dust devil: the life and times of the fungus that causes valley Fever. PLoS  
326 Pathog. 2015 May;11(5):e1004762.
- 327 3. Galgiani JN, Ampel NM, Catanzaro A, Johnson RH, Stevens DA, Williams PL. Practice guidelines for the  
328 treatment of coccidioidomycosis. Clin Infect Dis. 2000 Apr;30(4):658-61.
- 329 4. Freedman MB AS, Benedict K, McCotter O, Derado G, Hoekstra R, et al. Preliminary estimates of annual  
330 burden of coccidioidomycosis in the United States, 2010–2014. In: Group CS, editor. Coccidioidomycosis Study  
331 Group 61st Annual Meeting in collaboration with the 7th International Coccidioidomycosis Symposium. Palo  
332 Alto CA. Stanford CA: Coccidioidomycosis Study Group; 2017. p. 32.

- 333 5. Centers for Disease C, Prevention. Increase in reported coccidioidomycosis--United States, 1998-2011.  
334 MMWR Morb Mortal Wkly Rep. 2013 Mar 29;62(12):217-21.
- 335 6. Fisher MC, Koenig GL, White TJ, Taylor JW. Molecular and phenotypic description of *Coccidioides posadasii*  
336 *sp. nov.*, previously recognized as the non-California population of *Coccidioides immitis*. Mycologia. 2002 Jan-  
337 Feb;94(1):73-84.
- 338 7. Engelthaler DM, Roe CC, Hepp CM, Teixeira M, Driebe EM, Schupp JM, et al. Local Population Structure  
339 and Patterns of Western Hemisphere Dispersal for *Coccidioides spp.*, the Fungal Cause of Valley Fever. mBio. 2016  
340 Apr 26;7(2):e00550-16.
- 341 8. Teixeira MM, Barker BM. Use of Population Genetics to Assess the Ecology, Evolution, and Population  
342 Structure of *Coccidioides*. Emerg Infect Dis. 2016 Jun;22(6):1022-30.
- 343 9. Maxwell CS, Mattox K, Turissini DA, Teixeira MM, Barker BM, Matute DR. Gene exchange between two  
344 divergent species of the fungal human pathogen, *Coccidioides*. Evolution. 2019 Jan;73(1):42-58.
- 345 10. Teixeira MM, Alvarado P, Roe CC, Thompson GR, 3rd, Patane JSL, Sahl JW, et al. Population Structure and  
346 Genetic Diversity among Isolates of *Coccidioides posadasii* in Venezuela and Surrounding Regions. mBio. 2019  
347 Nov 26;10(6).
- 348 11. Neafsey DE, Barker BM, Sharpton TJ, Stajich JE, Park DJ, Whiston E, et al. Population genomic sequencing  
349 of *Coccidioides* fungi reveals recent hybridization and transposon control. Genome Res. 2010 Jul;20(7):938-46.
- 350 12. Mead HL, Teixeira MM, Galgiani JN, Barker BM. Characterizing in vitro spherule morphogenesis of  
351 multiple strains of both species of *Coccidioides*. Med Mycol. 2019 Jun 1;57(4):478-88.
- 352 13. Lewis ER, David VR, Doyle AL, Rajabi K, Kiefer JA, Pirrotte P, et al. Differences in Host Innate Responses  
353 among *Coccidioides* Isolates in a Murine Model of Pulmonary Coccidioidomycosis. Eukaryot Cell. 2015  
354 Oct;14(10):1043-53.
- 355 14. Friedman L, Smith CE. The comparison of four strains of *Coccidioides immitis* with diverse histories.  
356 Mycopathologia et mycologia applicata. 1957 Mar 25;8(1):47-53.
- 357 15. Berman RJ, Friedman L, Pappagianis D, Smith CE. Survival of *Coccidioides immitis* under controlled  
358 conditions of temperature and humidity. Am J Public Health Nations Health. 1956 Oct;46(10):1317-24.
- 359 16. Berman RJ, Friedman L, Roessler WG, Smith CE. The virulence and infectivity of twenty-seven strains of  
360 *Coccidioides immitis*. Am J Hyg. 1956 Sep;64(2):198-210.
- 361 17. Friedman L, Smith CE, Gordon LE. The assay of virulence of *Coccidioides* in white mice. J Infec Dis. 1955  
362 Nov-Dec;97(3):311-6.
- 363 18. Huppert M, Walker LJ. The selective and differential effects of cycloheximide on many strains of  
364 *Coccidioides immitis*. Am J Clin Pathol. 1958 Mar;29(3):291-5.
- 365 19. Egeberg RO, Elconin AE, Egeberg MC. Effect of Salinity and Temperature on *Coccidioides Immitis* and Three  
366 Antagonistic Soil Saprophytes. J Bacteriol. 1964 Aug;88:473-6.
- 367 20. Egeberg RO, Ely AF. *Coccidioides immitis* in the soil of the southern San Joaquin Valley. Am J Med Sci. 1956  
368 Feb;231(2):151-4.
- 369 21. Elconin AF, Egeberg RO, Egeberg MC. Significance of Soil Salinity on the Ecology of *Coccidioides Immitis*. J  
370 Bacteriol. 1964 Mar;87:500-3.
- 371 22. CW Emmons LA. The isolation of *Haplosporangium parvum n. Sp* and *Coccidioides immitis* from wild rodents.  
372 Their relationship to coccidioidomycosis. Public Health Rep. 1942;57(46):14715-27.
- 373 23. Emmons C. Isolation of *Coccidioides* from soil and rodents. Public Health Reports. 1942;57(4):109-11.
- 374 24. Maddy KT. The geographic distribution of *coccidioides immitis* and possible ecologic implications. Ariz Med.  
375 1958 Mar;15(3):178-88.

- 376 25. Maddy KT CH. Establishment of *Coccidioides immitis* in Negative Soil Following Burial of Infected Animal  
377 Tissues. The Second Symposium on Coccidioidomycosis. 1965:309-12.
- 378 26. Maddy KT. Observations on *Coccidioides Immitis* Found Growing Naturally in Soil. Ariz Med. 1965  
379 Apr;22:281-8.
- 380 27. Gorris ME, Treseder KK, Zender CS, Randerson JT. Expansion of Coccidioidomycosis Endemic Regions in  
381 the United States in Response to Climate Change. Geohealth. 2019 Oct;3(10):308-27.
- 382 28. Barker BM, Tabor JA, Shubitz LF, Perrill R, Orbach MJ. Detection and phylogenetic analysis of *Coccidioides*  
383 *posadasii* in Arizona soil samples. Fungal Ecol. 2012;5(2):163-76.
- 384 29. Barker BM, Litvintseva AP, Riquelme M, Vargas-Gastelum L. *Coccidioides* ecology and genomics. Med  
385 Mycol. 2019 Feb 1;57(Supplement\_1):S21-S9.
- 386 30. Luna-Isaac JA, Muniz-Salazar R, Baptista-Rosas RC, Enriquez-Paredes LM, Castanon-Olivares LR,  
387 Contreras-Perez C, et al. Genetic analysis of the endemic fungal pathogens *Coccidioides posadasii* and  
388 *Coccidioides immitis* in Mexico. Med Mycol. 2014 Feb;52(2):156-66.
- 389 31. McGinnis MR, Smith MB, Hinson E. Use of the *Coccidioides posadasii* Deltachs5 strain for quality control in  
390 the ACCUPROBE culture identification test for *Coccidioides immitis*. J Clin Microbiol. 2006 Nov;44(11):4250-1.
- 391 32. Litvintseva AP, Marsden-Haug N, Hurst S, Hill H, Gade L, Driebe EM, et al. Valley fever: finding new  
392 places for an old disease: *Coccidioides immitis* found in Washington State soil associated with recent human  
393 infection. Clin Infect Dis. 2015 Jan 1;60(1):e1-3.
- 394 33. Bowers JR, Parise KL, Kelley EJ, Lemmer D, Schupp JM, Driebe EM, et al. Direct detection of *Coccidioides*  
395 from Arizona soils using CocciENV, a highly sensitive and specific real-time PCR assay. Med Mycol. 2019  
396 Feb;57(2):246-55.
- 397 34. Sheff KW, York ER, Driebe EM, Barker BM, Rounsley SD, Waddell VG, et al. Development of a rapid, cost-  
398 effective TaqMan Real-Time PCR Assay for identification and differentiation of *Coccidioides immitis* and  
399 *Coccidioides posadasii*. Med Mycol. 2010 May;48(3):466-9.
- 400 35. Hamm PS, Hutchison MI, Leonard P, Melman S, Natvig DO. First Analysis of Human *Coccidioides* Isolates  
401 from New Mexico and the Southwest Four Corners Region: Implications for the Distributions of *C. posadasii* and  
402 *C. immitis* and Human Groups at Risk. J Fungi (Basel). 2019 Aug 10;5(3).
- 403 36. Thompson GR, 3rd. Pulmonary coccidioidomycosis. Semin Respir Crit Care Med. 2011 Dec;32(6):754-63.
- 404 37. Odio CD, Marciano BE, Galgiani JN, Holland SM. Risk Factors for Disseminated Coccidioidomycosis,  
405 United States. Emerg Infect Dis. 2017 Feb;23(2).
- 406 38. Galgiani JN. How does genetics influence Valley Fever? Research underway now to answer this question.  
407 Southwest Journal of Pulmonary and Critical Care. 2014;9(4):230-7.
- 408 39. Shubitz LF, Powell DA, Butkiewicz CD, Lewis ML, Trinh HT, Frelinger JA, et al. A Chronic Murine Disease  
409 Model of Coccidioidomycosis Using *Coccidioides posadasii*, strain 1038. J Infect Dis. 2020 Jul 13.
- 410 40. Davis KM. All *Yersinia* Are Not Created Equal: Phenotypic Adaptation to Distinct Niches Within  
411 Mammalian Tissues. Front Cell Infect Microbiol. 2018;8:261.
- 412 41. Phan HT, Rybak K, Furuki E, Breen S, Solomon PS, Oliver RP, et al. Differential effector gene expression  
413 underpins epistasis in a plant fungal disease. Plant J. 2016 Aug;87(4):343-54.
- 414 42. Abdelsamed H, Peters J, Byrne GI. Genetic variation in *Chlamydia trachomatis* and their hosts: impact on  
415 disease severity and tissue tropism. Future Microbiol. 2013 Sep;8(9):1129-46.
- 416 43. Freguja R, Gianesin K, Zanchetta M, De Rossi A. Cross-talk between virus and host innate immunity in  
417 pediatric HIV-1 infection and disease progression. New Microbiol. 2012 Jul;35(3):249-57.

- 418 44. Gauthier GM. Fungal Dimorphism and Virulence: Molecular Mechanisms for Temperature Adaptation,  
419 Immune Evasion, and In Vivo Survival. *Mediators Inflamm.* 2017;2017:8491383.
- 420 45. Sil A, Andrianopoulos A. Thermally Dimorphic Human Fungal Pathogens--Polyphyletic Pathogens with a  
421 Convergent Pathogenicity Trait. *Cold Spring Harb Perspect Med.* 2014 Nov 10;5(8):a019794.
- 422 46. Perini L, Mogrovejo DC, Tomazin R, Gostincar C, Brill FHH, Gunde-Cimerman N. Phenotypes Associated  
423 with Pathogenicity: Their Expression in Arctic Fungal Isolates. *Microorganisms.* 2019 Nov 22;7(12).
- 424 47. Williams-Rhaesa AM, Awuku NK, Lipscomb GL, Poole FL, Rubinstein GM, Conway JM, et al. Native  
425 xylose-inducible promoter expands the genetic tools for the biomass-degrading, extremely thermophilic  
426 bacterium *Caldicellulosiruptor bescii*. *Extremophiles.* 2018 Jul;22(4):629-38.
- 427 48. den Besten HMW, Wells-Bennik MHJ, Zwietering MH. Natural Diversity in Heat Resistance of Bacteria  
428 and Bacterial Spores: Impact on Food Safety and Quality. *Annu Rev Food Sci Technol.* 2018 Mar 25;9:383-410.
- 429 49. Barzkar N, Homaei A, Hemmati R, Patel S. Thermostable marine microbial proteases for industrial  
430 applications: scopes and risks. *Extremophiles.* 2018 May;22(3):335-46.
- 431 50. Choi DH, Park EH, Kim MD. Isolation of thermotolerant yeast *Pichia kudriavzevii* from nuruk. *Food Sci*  
432 *Biotechnol.* 2017;26(5):1357-62.
- 433 51. Kamthan A, Kamthan M, Datta A. Expression of C-5 sterol desaturase from an edible mushroom in fisson  
434 yeast enhances its ethanol and thermotolerance. *PLoS One.* 2017;12(3):e0173381.
- 435 52. Matsushita K, Azuma Y, Kosaka T, Yakushi T, Hoshida H, Akada R, et al. Genomic analyses of  
436 thermotolerant microorganisms used for high-temperature fermentations. *Biosci Biotechnol Biochem.*  
437 2016;80(4):655-68.
- 438 53. Reidy M, Sharma R, Shastry S, Roberts BL, Albino-Flores I, Wickner S, et al. Hsp40s specify functions of  
439 Hsp104 and Hsp90 protein chaperone machines. *PLoS Genet.* 2014 Oct;10(10):e1004720.
- 440 54. Bhabhra R, Askew DS. Thermotolerance and virulence of *Aspergillus fumigatus*: role of the fungal nucleolus.  
441 *Med Mycol.* 2005 May;43 Suppl 1:S87-93.
- 442 55. Robert VA, Casadevall A. Vertebrate endothermy restricts most fungi as potential pathogens. *J Infect Dis.*  
443 2009 Nov 15;200(10):1623-6.
- 444 56. Casadevall A, Steenbergen JN, Nosanchuk JD. 'Ready made' virulence and 'dual use' virulence factors in  
445 pathogenic environmental fungi--the *Cryptococcus neoformans* paradigm. *Curr Opin Microbiol.* 2003  
446 Aug;6(4):332-7.
- 447 57. Denham ST, Wambaugh MA, Brown JCS. How Environmental Fungi Cause a Range of Clinical Outcomes  
448 in Susceptible Hosts. *J Mol Biol.* 2019 Jul 26;431(16):2982-3009.
- 449 58. Del Rocio Reyes-Montes M, Perez-Huitron MA, Ocana-Monroy JL, Frias-De-Leon MG, Martinez-Herrera  
450 E, Arenas R, et al. The habitat of *Coccidioides spp.* and the role of animals as reservoirs and disseminators in  
451 nature. *BMC Infect Dis.* 2016 Oct 10;16(1):550.
- 452 59. Shubitz LF. Comparative aspects of coccidioidomycosis in animals and humans. *Ann NY Acad Sci.* 2007  
453 Sep;1111:395-403.
- 454 60. Eulalio KD, de Macedo RL, Cavalcanti MA, Martins LM, Lazera MS, Wanke B. *Coccidioides immitis* isolated  
455 from armadillos (*Dasypus novemcinctus*) in the state of Piauí, northeast Brazil. *Mycopathologia.* 2001;149(2):57-  
456 61.
- 457 61. Swatek FE, Plunkett OA. Experimental Infections of Wild Rodents and Animals other than Mammals. In:  
458 Ajello L, editor. *Proceedings of the First Symposium on Coccidioidomycosis*; 1957; Phoenix, AZ: University of  
459 Arizona Press; 1957. p. 161-7.

- 460 62. Burt A, Carter DA, Koenig GL, White TJ, Taylor JW. Molecular markers reveal cryptic sex in the human  
461 pathogen *Coccidioides immitis*. Proc Natl Acad Sci U S A. 1996 Jan 23;93(2):770-3.
- 462 63. Bates D, Machler M, Bolker BM, Walker SC. Fitting Linear Mixed-Effects Models Using lme4. J of Stat  
463 Software. 2015 Oct;67(1):1-48.
- 464 64. Team RC. R: A Language and Environment for Statistical Computing. 2020.
- 465 65. Canty AR, BD. boot: Bootstrap R (S-Plus) Functions. R package version 1.3-24. 2019.
- 466 66. Davison AC, Hinkley DV. Bootstrap methods and their application. Cambridge ; New York, NY, USA:  
467 Cambridge University Press; 1997.
- 468 67. Tiwari S, Thakur R, Shankar J. Role of Heat-Shock Proteins in Cellular Function and in the Biology of Fungi.  
469 Biotechnol Res Int. 2015;2015:132635.
- 470 68. Brown AJ, Leach MD, Nicholls S. The relevance of heat shock regulation in fungal pathogens of humans.  
471 Virulence. 2010 Jul-Aug;1(4):330-2.
- 472 69. Viriyakosol S, Singhania A, Fierer J, Goldberg J, Kirkland TN, Woelk CH. Gene expression in human fungal  
473 pathogen *Coccidioides immitis* changes as arthroconidia differentiate into spherules and mature. BMC Microbiol.  
474 2013 May 28;13:121.
- 475 70. Whiston E, Zhang Wise H, Sharpton TJ, Jui G, Cole GT, Taylor JW. Comparative transcriptomics of the  
476 saprobic and parasitic growth phases in *Coccidioides* spp. PLoS One. 2012;7(7):e41034.
- 477 71. Mead HL, Roe CC, Higgins Keppler EA, Van Dyke MCC, Laux KL, Funke AL, et al. Defining critical genes  
478 during spherule remodeling and endospore development in the fungal pathogen, *Coccidioides posadasii*. 2020.
- 479 72. Narra HP, Shubitz LF, Mandel MA, Trinh HT, Griffin K, Buntzman AS, et al. A *Coccidioides posadasii* CPS1  
480 Deletion Mutant Is Avirulent and Protects Mice from Lethal Infection. Infect Immun. 2016 Oct;84(10):3007-16.
- 481 73. Gorovits R, Propheta O, Kolot M, Dombardi V, Yarden O. A mutation within the catalytic domain of COT1  
482 kinase confers changes in the presence of two COT1 isoforms and in Ser/Thr protein kinase and phosphatase  
483 activities in *Neurospora crassa*. Fungal Genet Biol. 1999 Jul-Aug;27(2-3):264-74.
- 484 74. Yarden O, Plamann M, Ebbola DJ, Yanofsky C. cot-1, a gene required for hyphal elongation in *Neurospora*  
485 *crassa*, encodes a protein kinase. EMBO J. 1992 Jun;11(6):2159-66.
- 486 75. Li XC, Peris D, Hittinger CT, Sia EA, Fay JC. Mitochondria-encoded genes contribute to evolution of heat  
487 and cold tolerance in yeast. Sci Adv. 2019 Jan;5(1):eaav1848.
- 488 76. Fisher MC, Koenig GL, White TJ, San-Blas G, Negroni R, Alvarez IG, et al. Biogeographic range expansion  
489 into South America by *Coccidioides immitis* mirrors New World patterns of human migration. Proc Natl Acad Sci  
490 U S A. 2001 Apr 10;98(8):4558-62.
- 491 77. Park BJ, Sigel K, Vaz V, Komatsu K, McRill C, Phelan M, et al. An epidemic of coccidioidomycosis in  
492 Arizona associated with climatic changes, 1998-2001. J Infect Dis. 2005 Jun 1;191(11):1981-7.
- 493 78. Kolivras KN, Comrie AC. Modeling valley fever (coccidioidomycosis) incidence on the basis of climate  
494 conditions. Int J Biometeorol. 2003 Mar;47(2):87-101.
- 495 79. Gorris ME, Cat LA, Zender CS, Treseder KK, Randerson JT. Coccidioidomycosis Dynamics in Relation to  
496 Climate in the Southwestern United States. Geohealth. 2018 Jan;2(1):6-24.
- 497 80. Coopersmith EJ, Bell JE, Benedict K, Shriber J, McCotter O, Cosh MH. Relating coccidioidomycosis (valley  
498 fever) incidence to soil moisture conditions. Geohealth. 2017 Apr 17;1:51-63.
- 499 81. Comrie AC. Climate factors influencing coccidioidomycosis seasonality and outbreaks. Environ Health  
500 Perspect. 2005 Jun;113(6):688-92.
- 501 82. Maddy KT, Coccozza J. The Probable Geographic Distribution of *Coccidioides Immitis* in Mexico. Bol Oficina  
502 Sanit Panam. 1964 Jul;57:44-54.

- 503 83. NOAA National Centers for Environmental information, Climate at a Glance: County Mapping. 04/2020  
504 ed.
- 505 84. Taylor JW, Barker BM. The endozoan, small-mammal reservoir hypothesis and the life cycle of *Coccidioides*  
506 species. *Med Mycol.* 2019 Feb 1;57(Supplement\_1):S16-S20.
- 507 85. Protsiv M, Ley C, Lankester J, Hastie T, Parsonnet J. Decreasing human body temperature in the United  
508 States since the industrial revolution. *Elife.* 2020 Jan 7;9.
- 509 86. Sampaio EP, Hsu AP, Pechacek J, Bax HI, Dias DL, Paulson ML, et al. Signal transducer and activator of  
510 transcription 1 (STAT1) gain-of-function mutations and disseminated coccidioidomycosis and histoplasmosis. *J*  
511 *Allergy Clin Immunol.* 2013 Jun;131(6):1624-34.
- 512 87. Lewis ERG, David VR, Doyle AL, Rajabi K, Kiefer JA, Pirrotte P, et al. Differences in Host Innate Responses  
513 among *Coccidioides* Isolates in a Murine Model of Pulmonary Coccidioidomycosis. *Eukaryot Cell*; 2015. p.  
514 1043-53.
- 515 88. Gonzalez A, Hung CY, Cole GT. *Coccidioides* releases a soluble factor that suppresses nitric oxide  
516 production by murine primary macrophages. *Microb Pathog.* 2011 Feb;50(2):100-8.
- 517 89. Hung CY, Zhang H, Castro-Lopez N, Ostroff GR, Khoshlenar P, Abraham A, et al. Glucan-Chitin Particles  
518 Enhance Th17 Response and Improve Protective Efficacy of a Multivalent Antigen (rCpa1) against Pulmonary  
519 *Coccidioides posadasii* Infection. *Infect Immun.* 2018;86(11).
- 520 90. Kirkland TN, Fierer J. *Coccidioides immitis* and *posadasii*; A review of their biology, genomics, pathogenesis,  
521 and host immunity. *Virulence*; 2018. p. 1426-35.
- 522 91. Viriyakosol S, Kapoor M, Okamoto S, Covell J, Soltow QA, Trzoss M, et al. APX001 and Other Gwt1  
523 Inhibitor Prodrugs Are Effective in Experimental *Coccidioides immitis* Pneumonia. *Antimicrob Agents*  
524 *Chemother.* 2019 Feb;63(2).
- 525

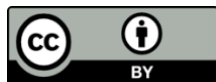

© 2020 by the authors. Submitted for possible open access publication under the terms and conditions of the Creative Commons Attribution (CC BY) license (<http://creativecommons.org/licenses/by/4.0/>).

*C. posadasii*

*C. immitis*

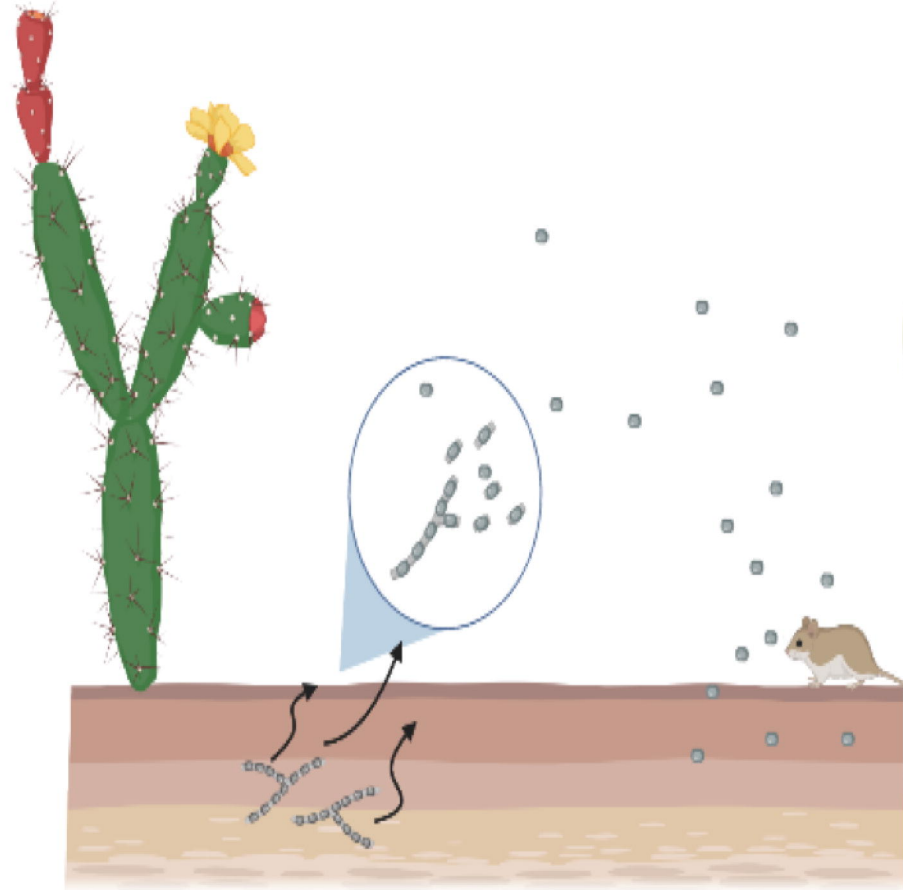

28°C

37°C

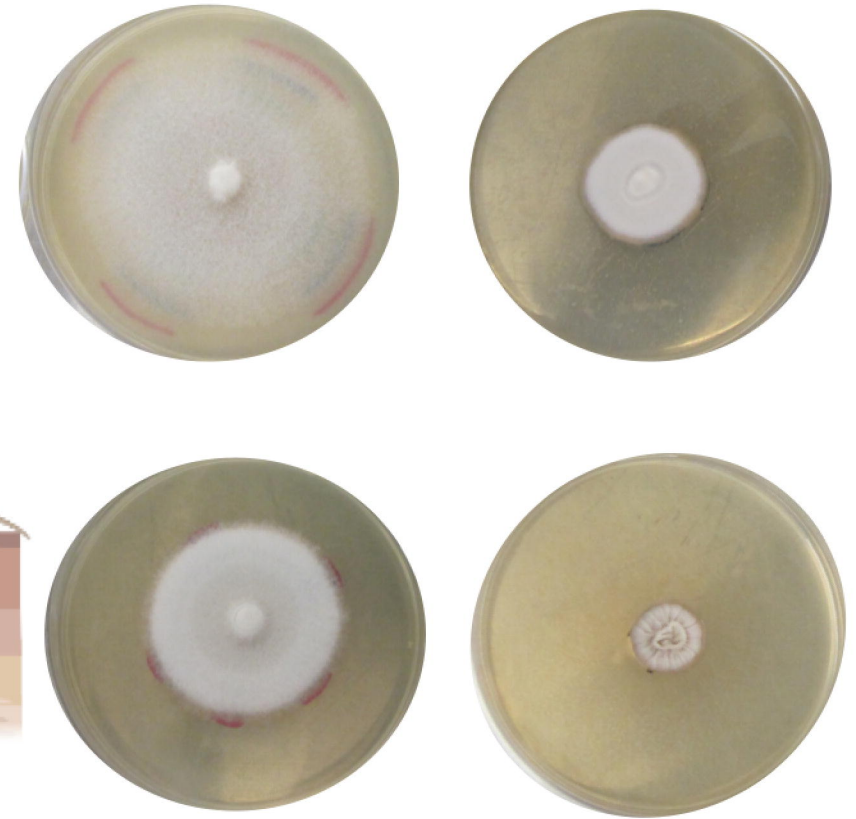

**Onygenaceae or dimorphic fungi**
